# Supplementary material for: Synthesis and photophysical properties of 1,7-aroyl BODIPYs: an experimental and theoretical study
Source: Royal Society of Chemistry journal article supplement (doi:10.1039/d2nj04237a), 2022-01-01
Supplement: d2nj04237a2.pdf [file d2nj04237a2.pdf]

## Synthesis and photophysical properties of 1,7-aroYL BODIPYs: An experimental and theoretical study

Ilya V. Efimov,<sup>\*[a]</sup> Almira R. Miftyakhova,<sup>[a]</sup> Maria D. Matveeva,<sup>[b]</sup> Dmitry I. Zhilyaev,<sup>[a]</sup> Paweł Czulkin,<sup>[c]</sup> Patryk Janasik,<sup>[c]</sup> Giovanni Talarico<sup>\*[d]</sup> and Leonid G. Voskressensky<sup>[a]</sup>

<sup>a</sup> *Research Center: Molecular Design and Synthesis of Innovative Compounds for Medicine, RUDN University, 117198, Russia, Moscow, Miklukho-Maklaya st, 6*

<sup>b</sup> *A.V. Topchiev Institute of Petrochemical Synthesis, Russian Academy of Sciences, Leninsky pr. 29, 119991, Moscow, Russian Federation*

<sup>c</sup> *Department of Physical Chemistry and Technology of Polymers, Faculty of Chemistry, Silesian University of Technology, Strzody 9,44-100 Gliwice, Poland*

<sup>d</sup> *Dipartimento di Scienze Chimiche, Università di Napoli Federico II, Via Cintia, 80126 Napoli, Italy*

*\* Corresponding author. E-mail address: ilya.efimov00@gmail.com*

### Supporting information

#### Table of Contents

|                                        |    |
|----------------------------------------|----|
| 1. NMR spectra for products .....      | 2  |
| 2. HRMS .....                          | 23 |
| 3. Quantum-chemical calculations ..... | 30 |
| 4. Reference .....                     | 35 |

# 1. NMR spectra for products

## <sup>1</sup>H NMR spectrum of 4a

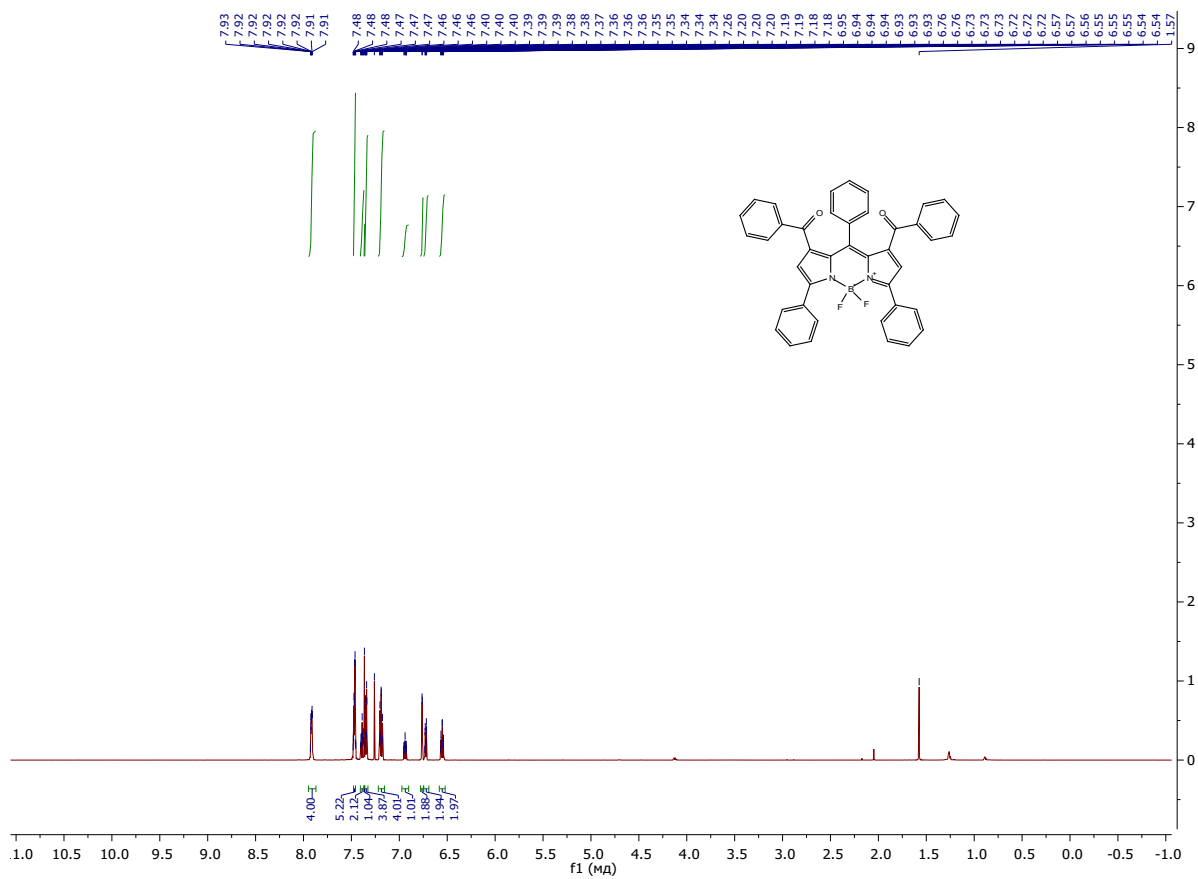

## <sup>13</sup>C NMR spectrum of 4a

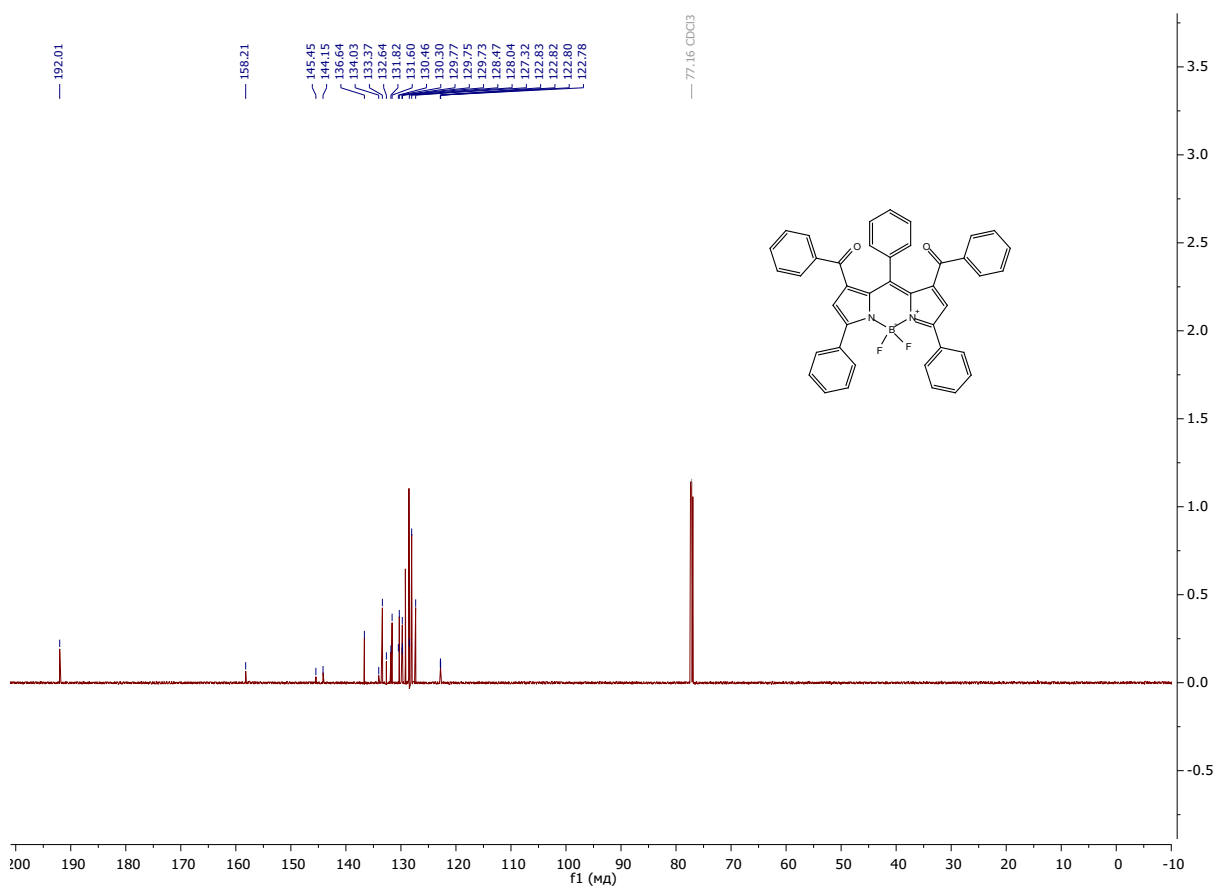

### $^{19}\text{F}$ NMR spectrum of **4a**

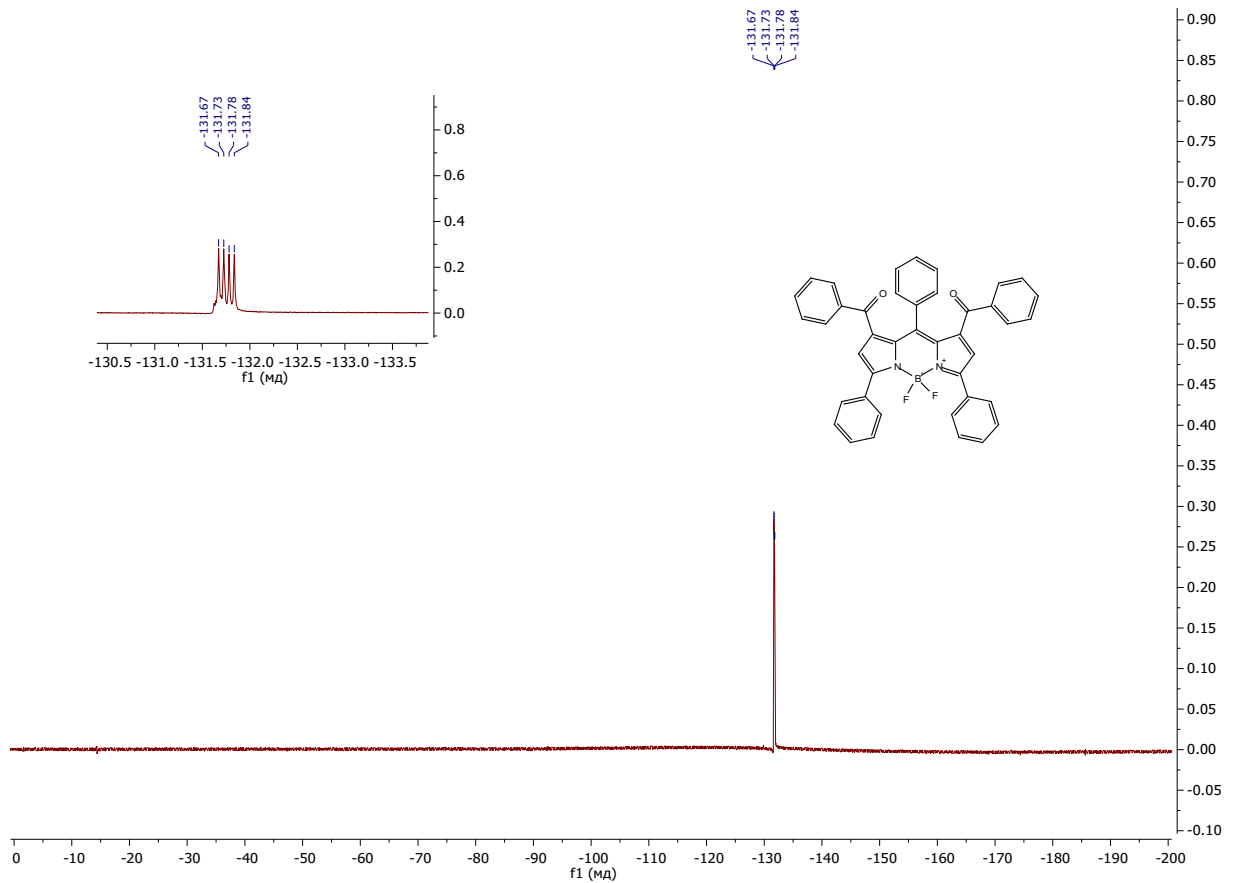

### $^1\text{H}$ NMR spectrum of **4b**

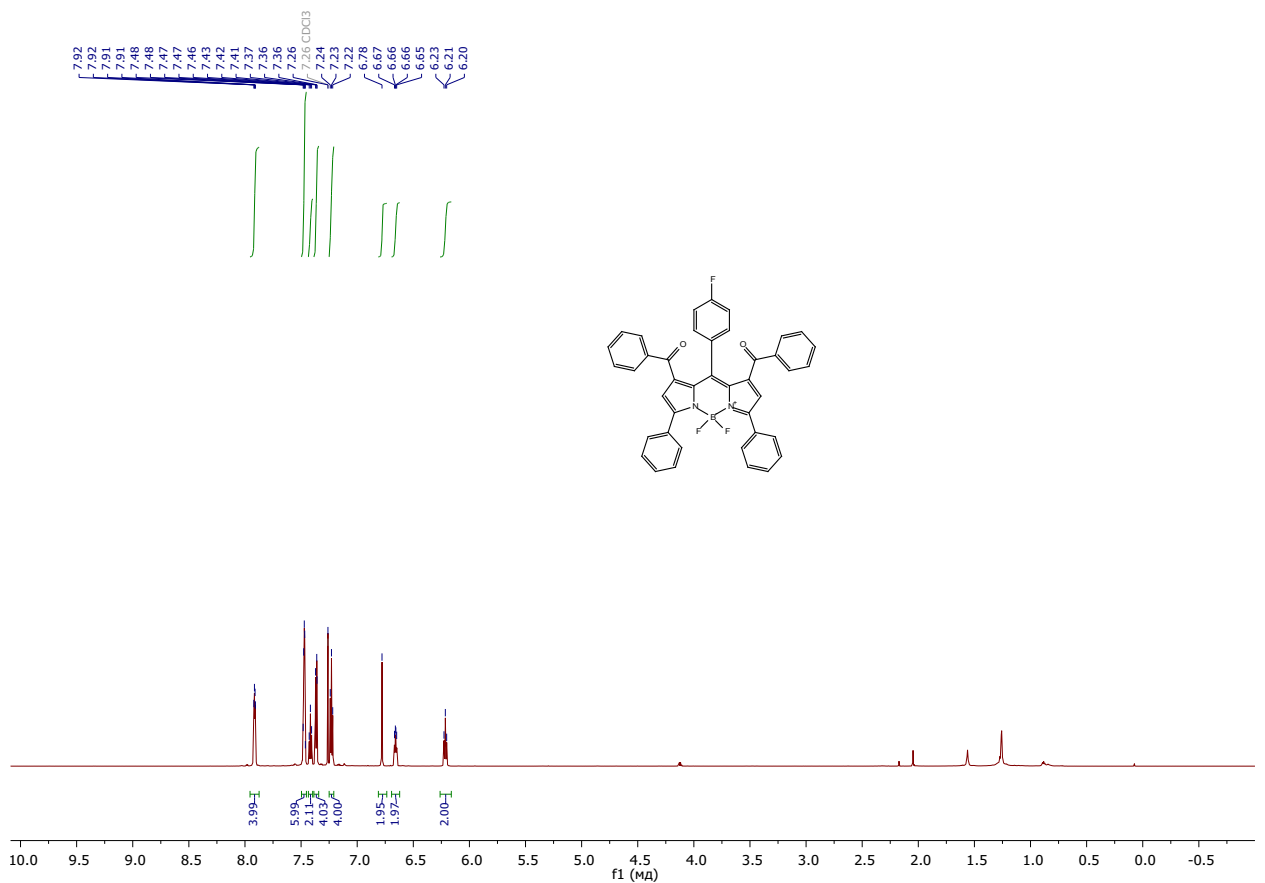

### <sup>13</sup>C NMR spectrum of **4b**

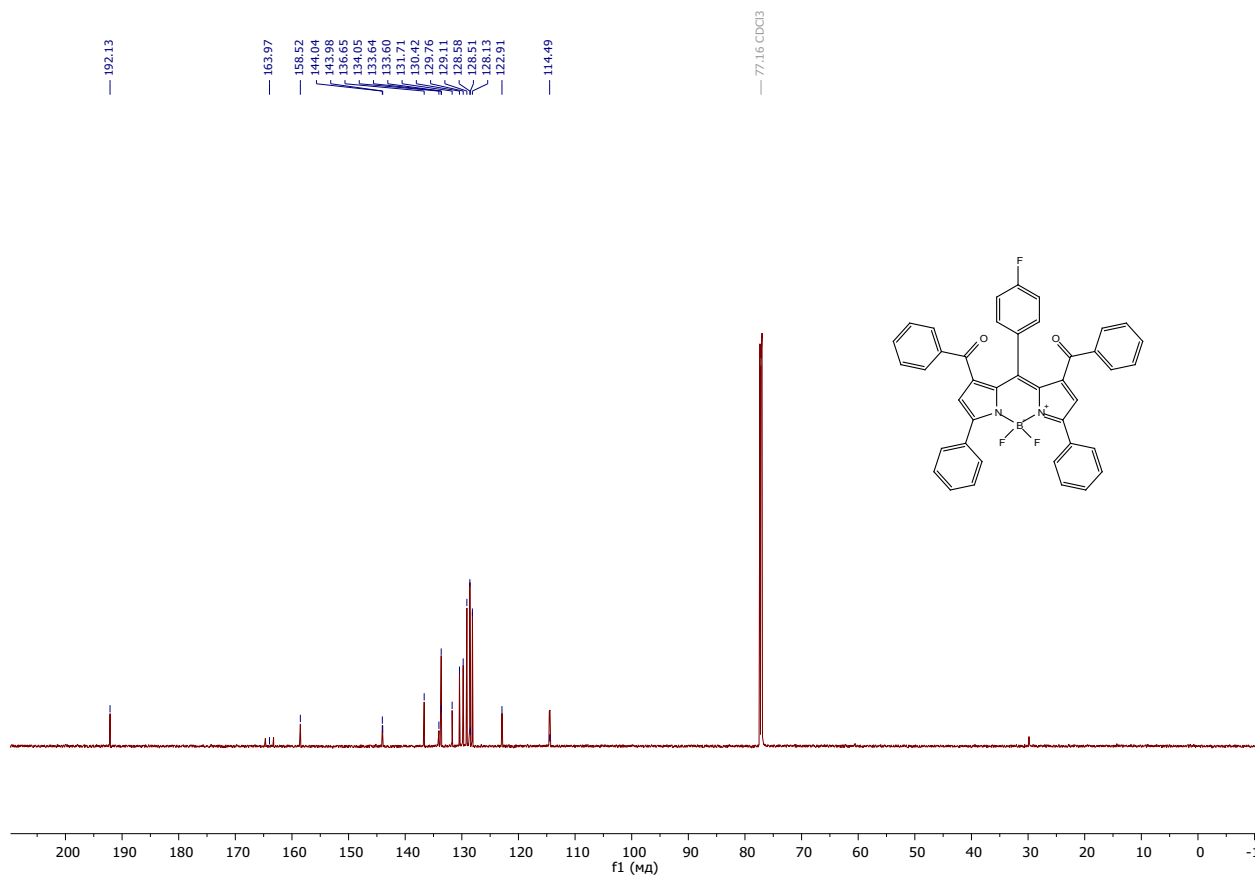

### <sup>19</sup>F NMR spectrum of **4b**

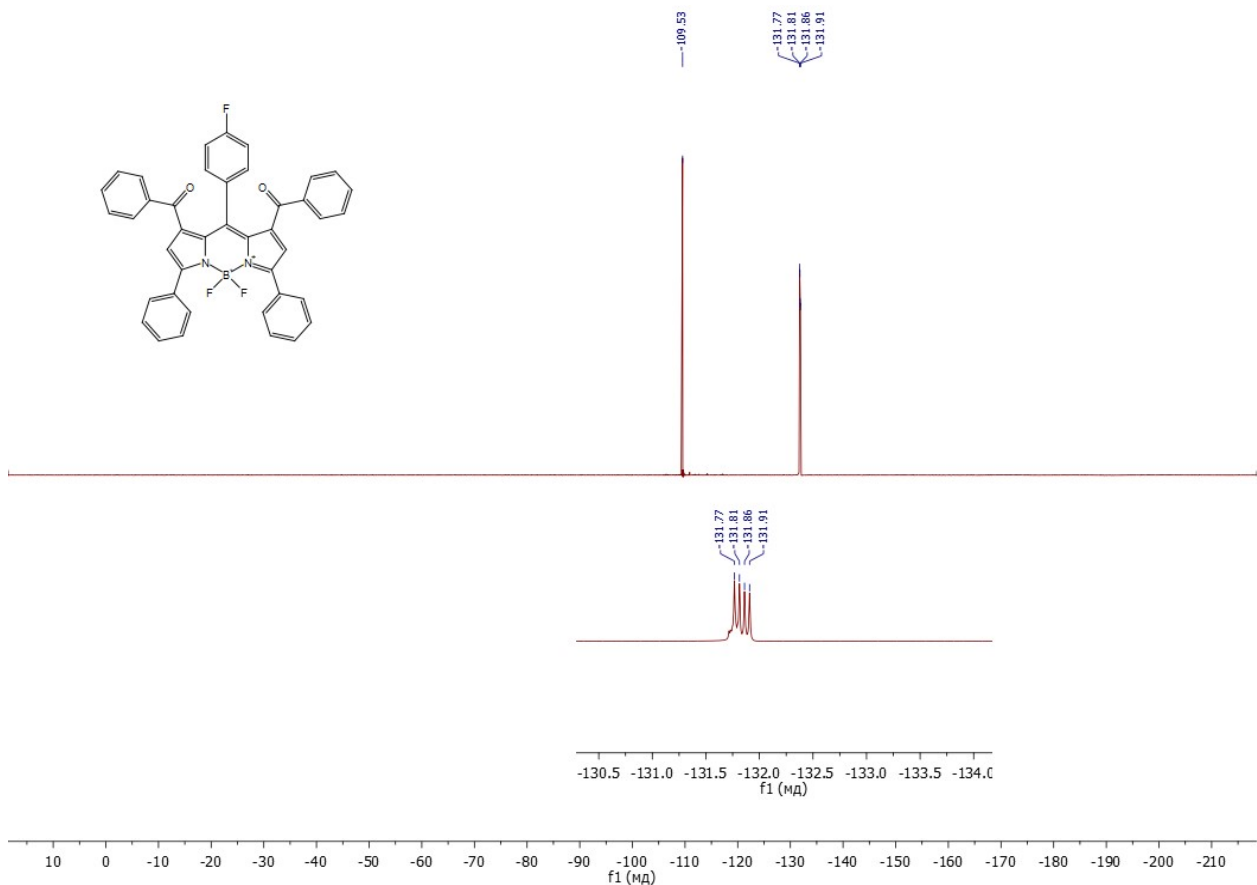

# <sup>1</sup>H NMR spectrum of 4c

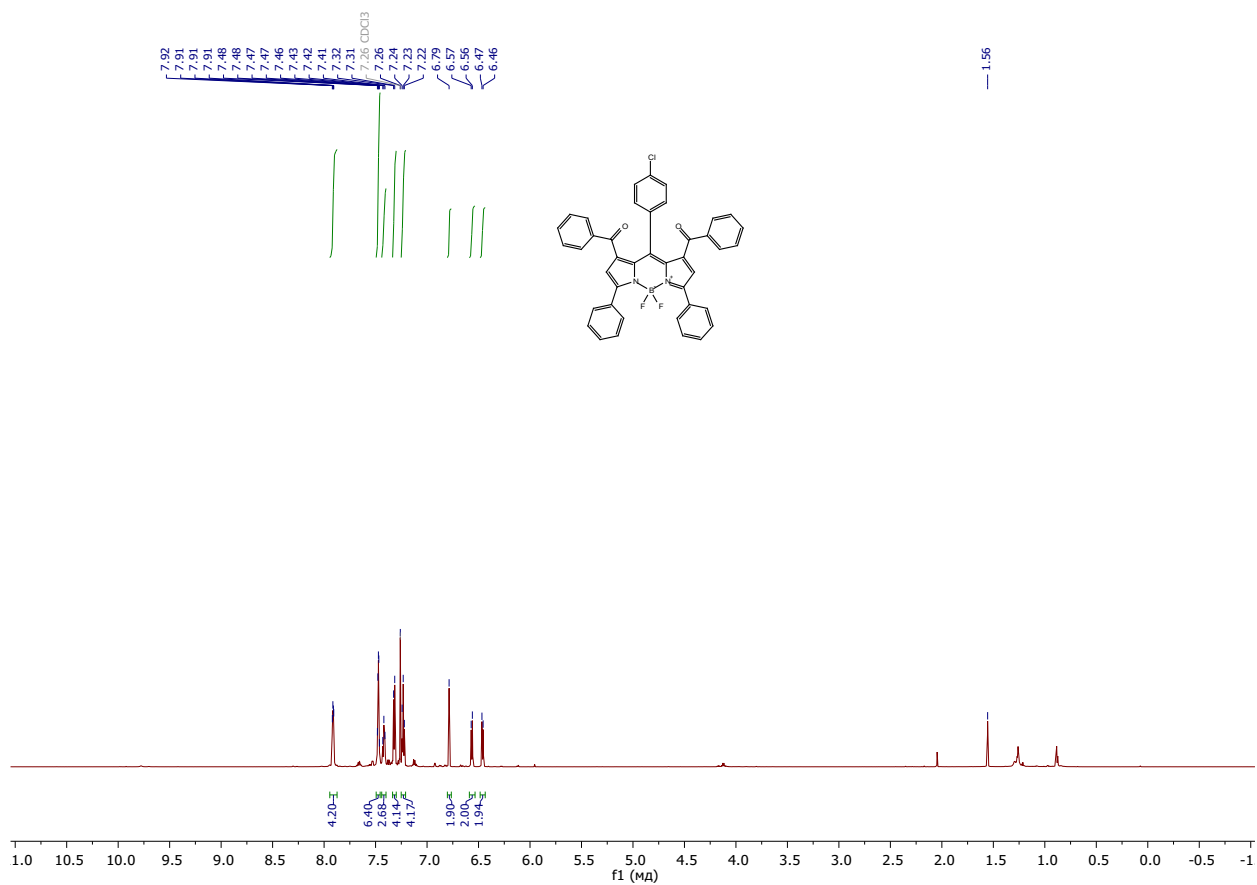

# <sup>13</sup>C NMR spectrum of 4c

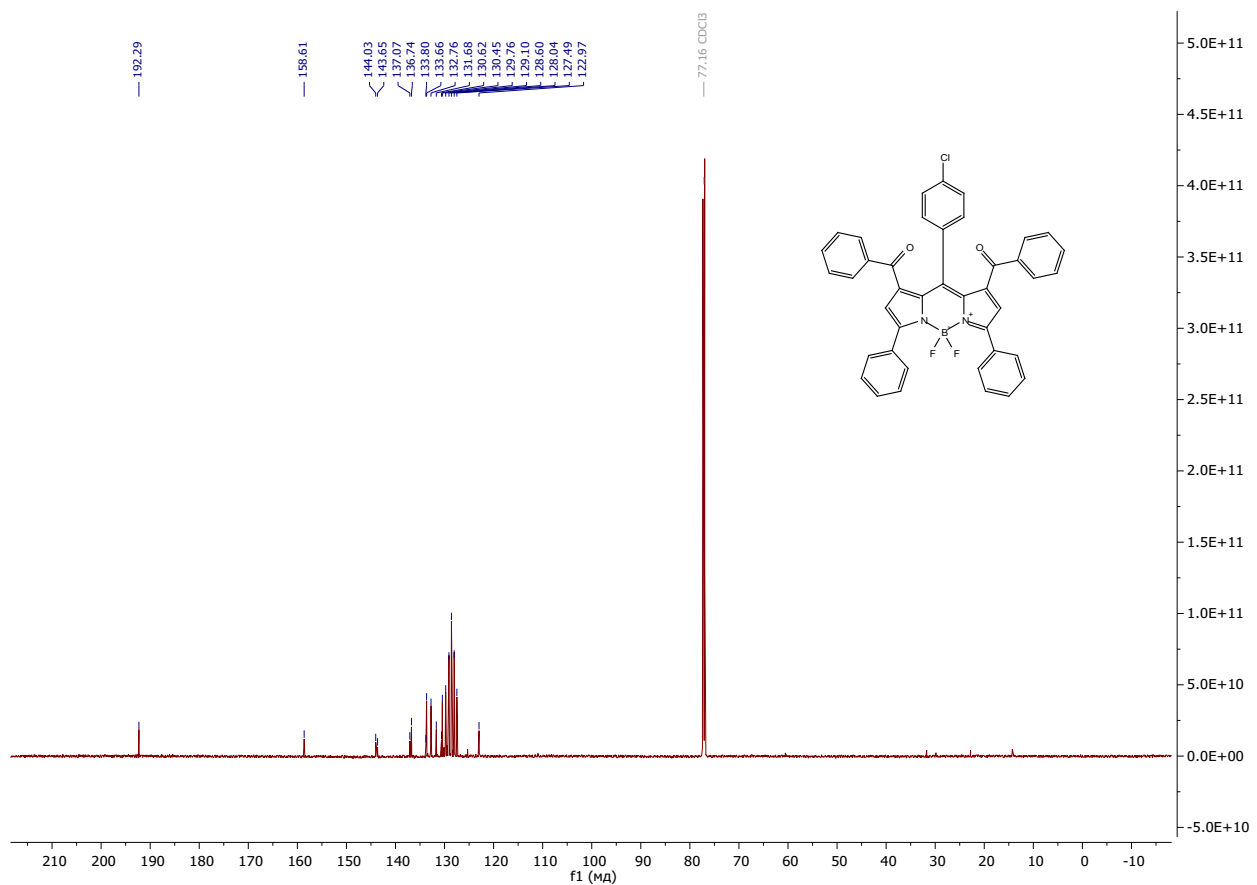

### <sup>19</sup>F NMR spectrum of **4c**

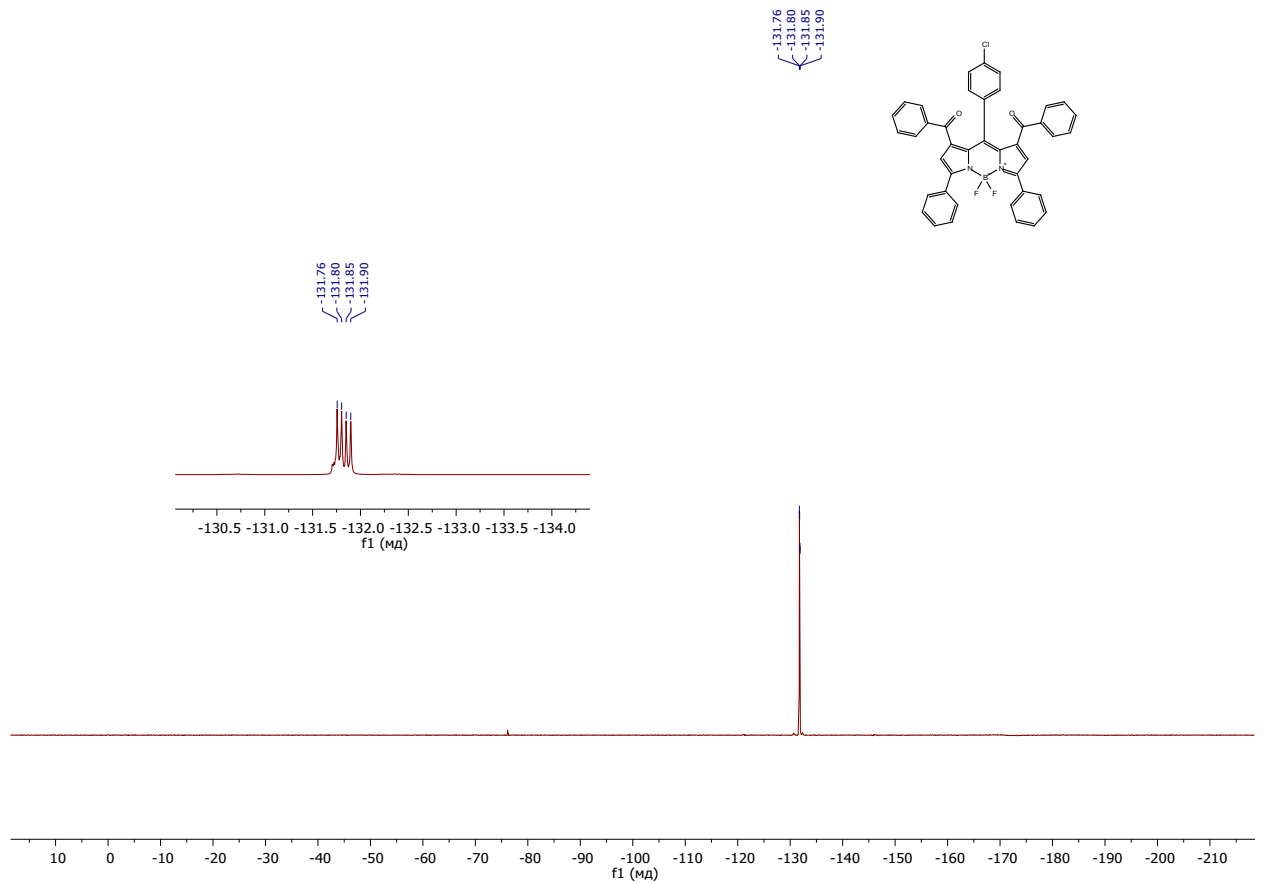

### <sup>1</sup>H NMR spectrum of **4d**

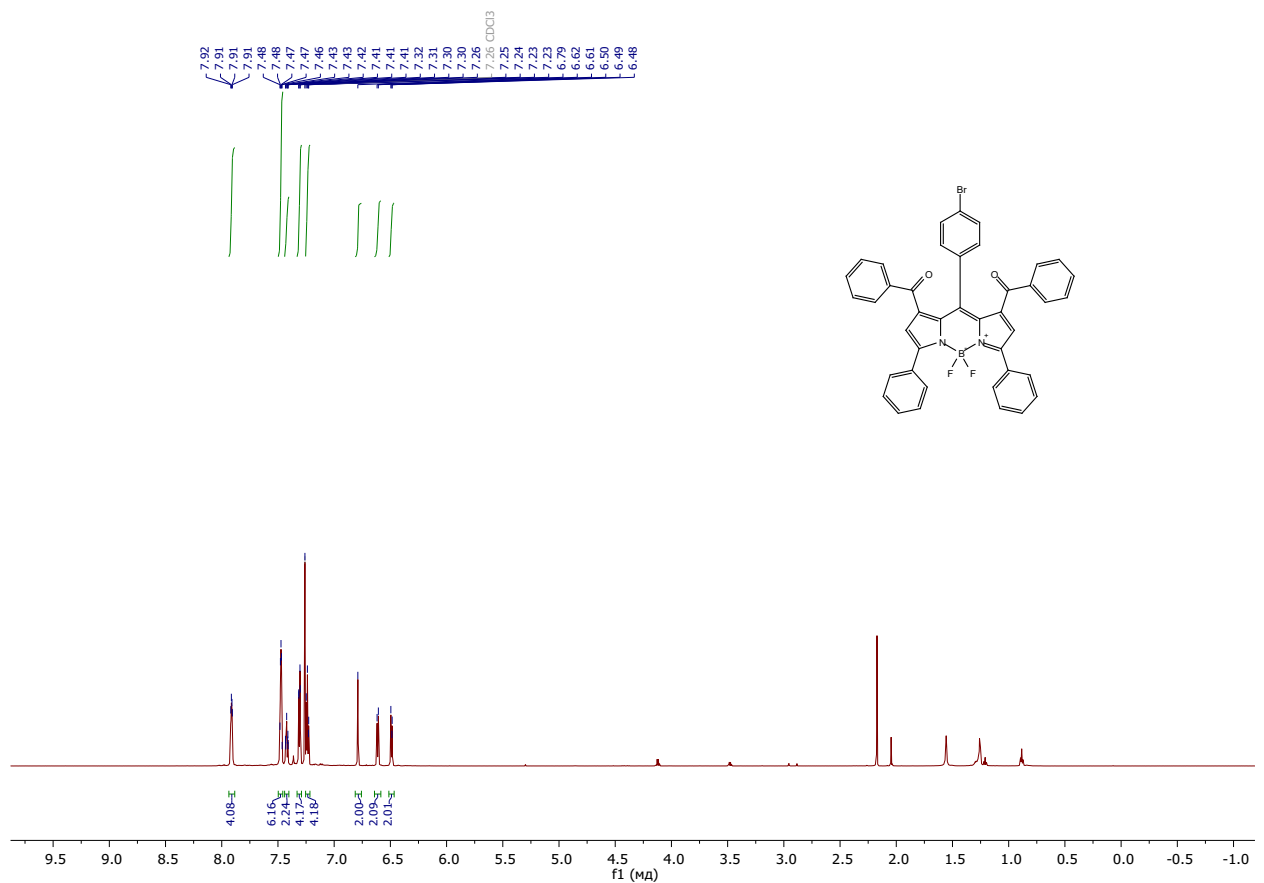

### $^{13}\text{C}$ NMR spectrum of **4d**

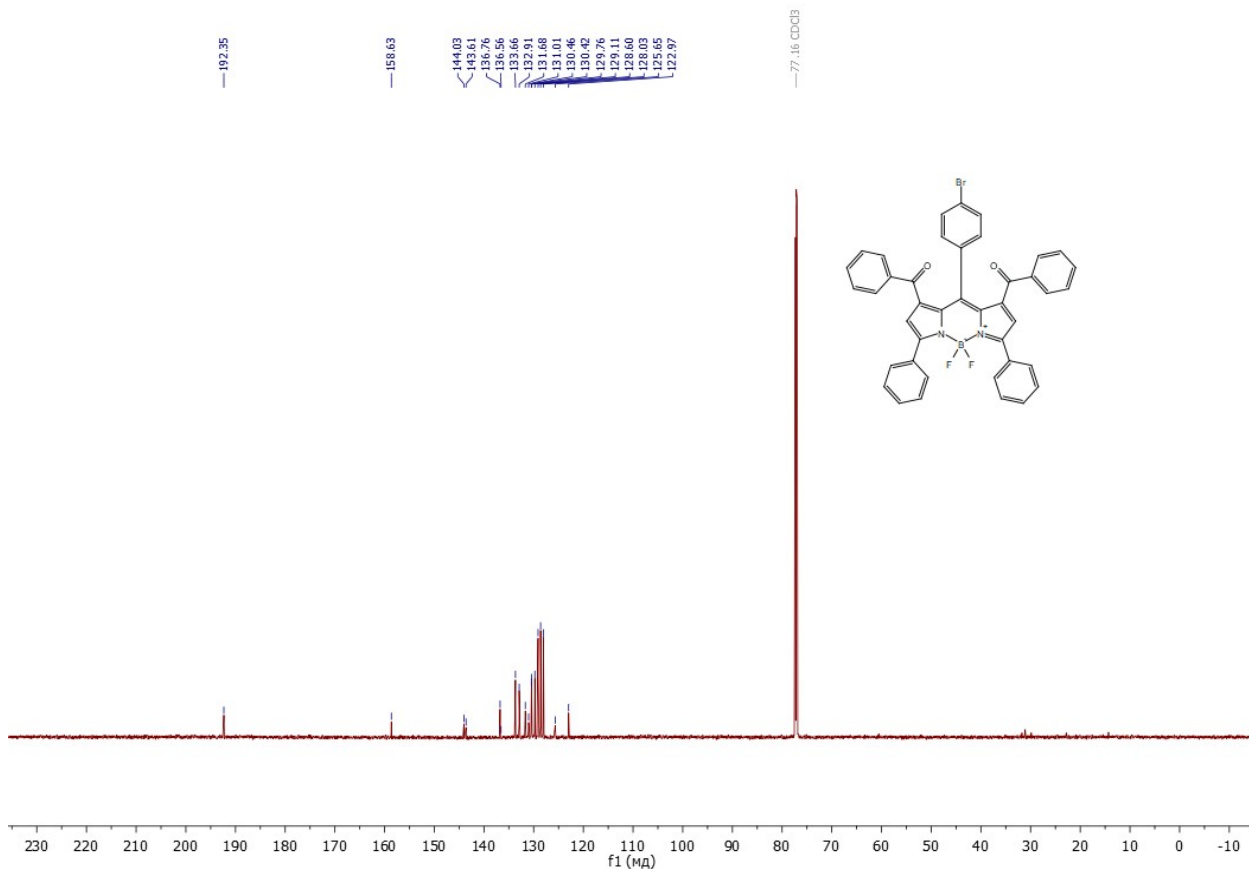

### $^{19}\text{F}$ NMR spectrum of **4d**

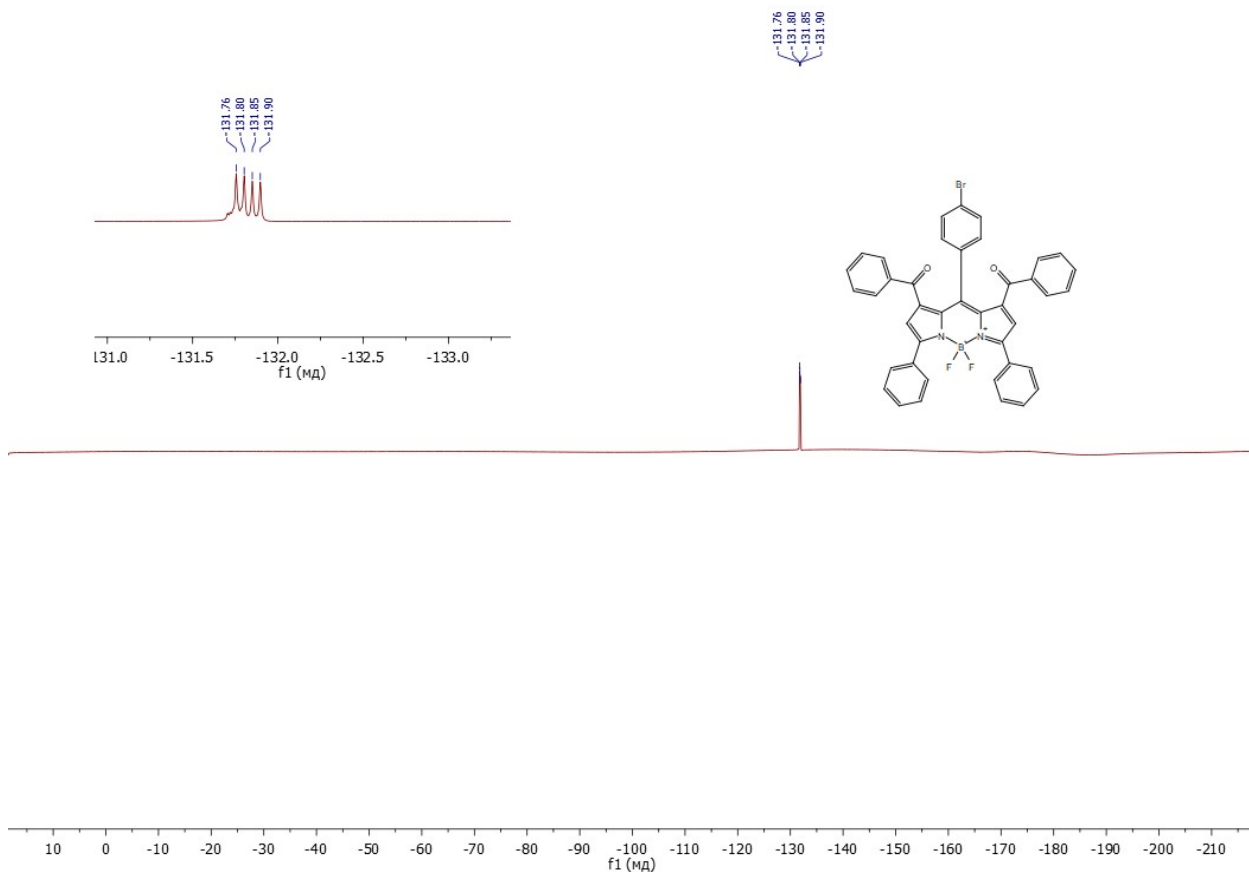

### <sup>1</sup>H NMR spectrum of 4e

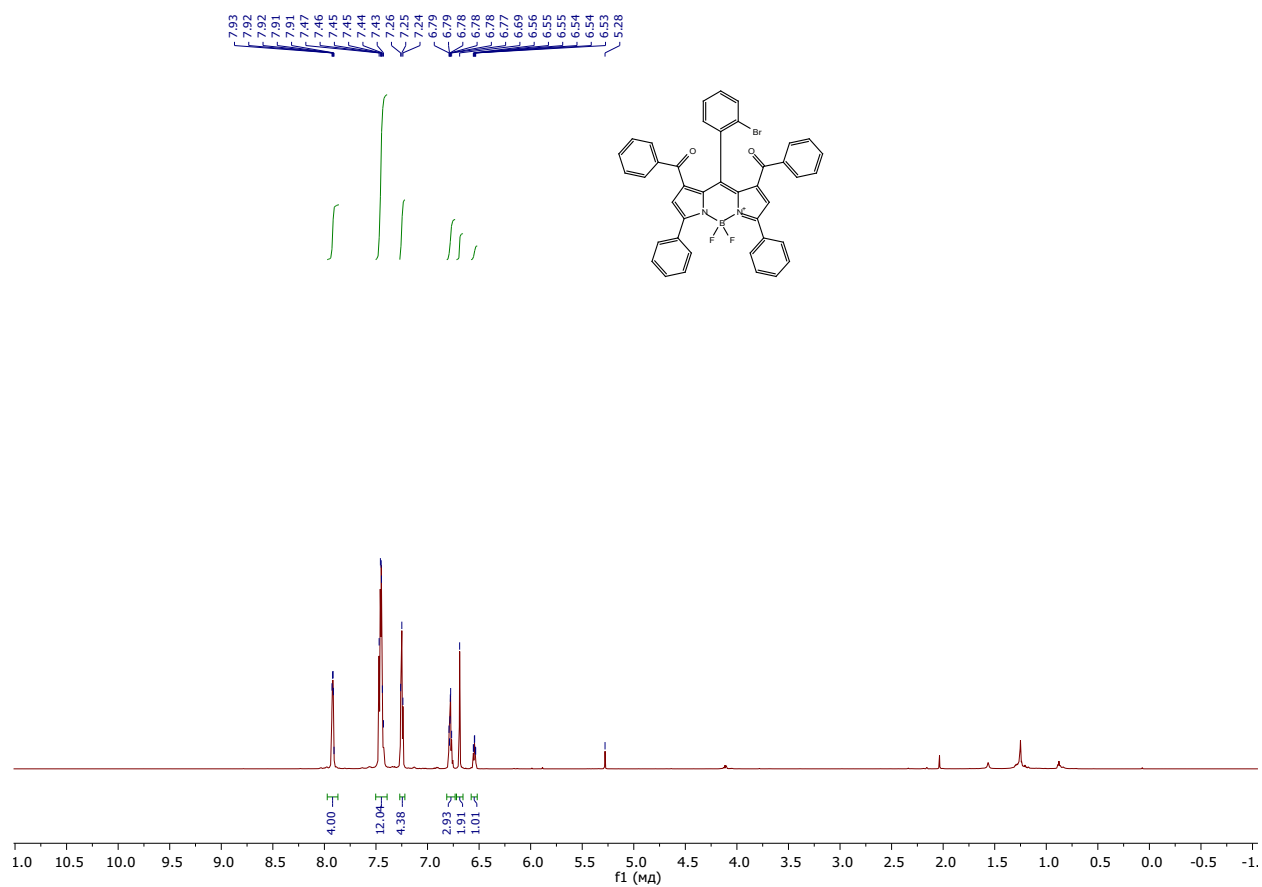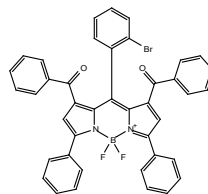

### <sup>13</sup>C NMR spectrum of 4e

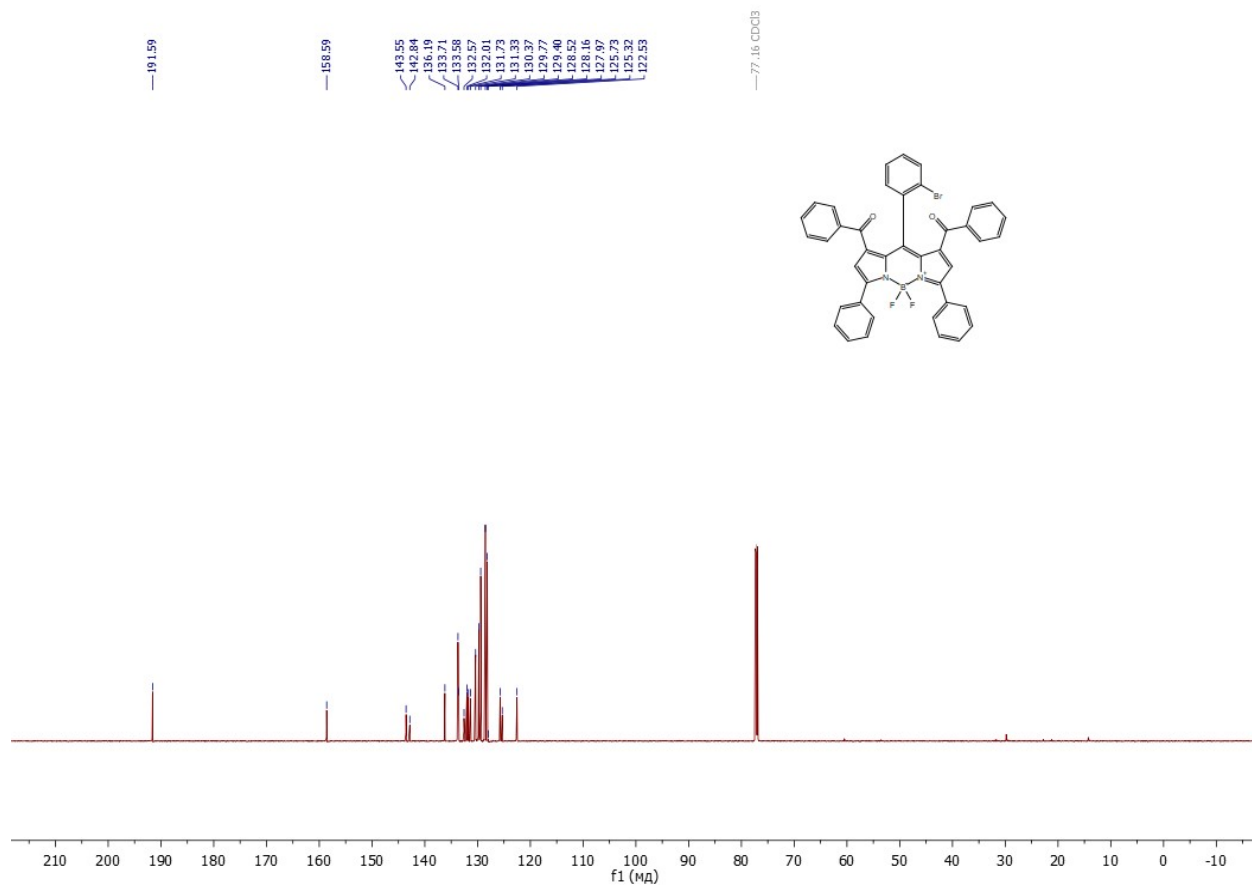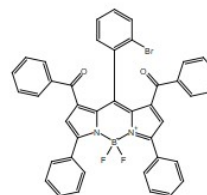



### <sup>19</sup>F NMR spectrum of **4e**

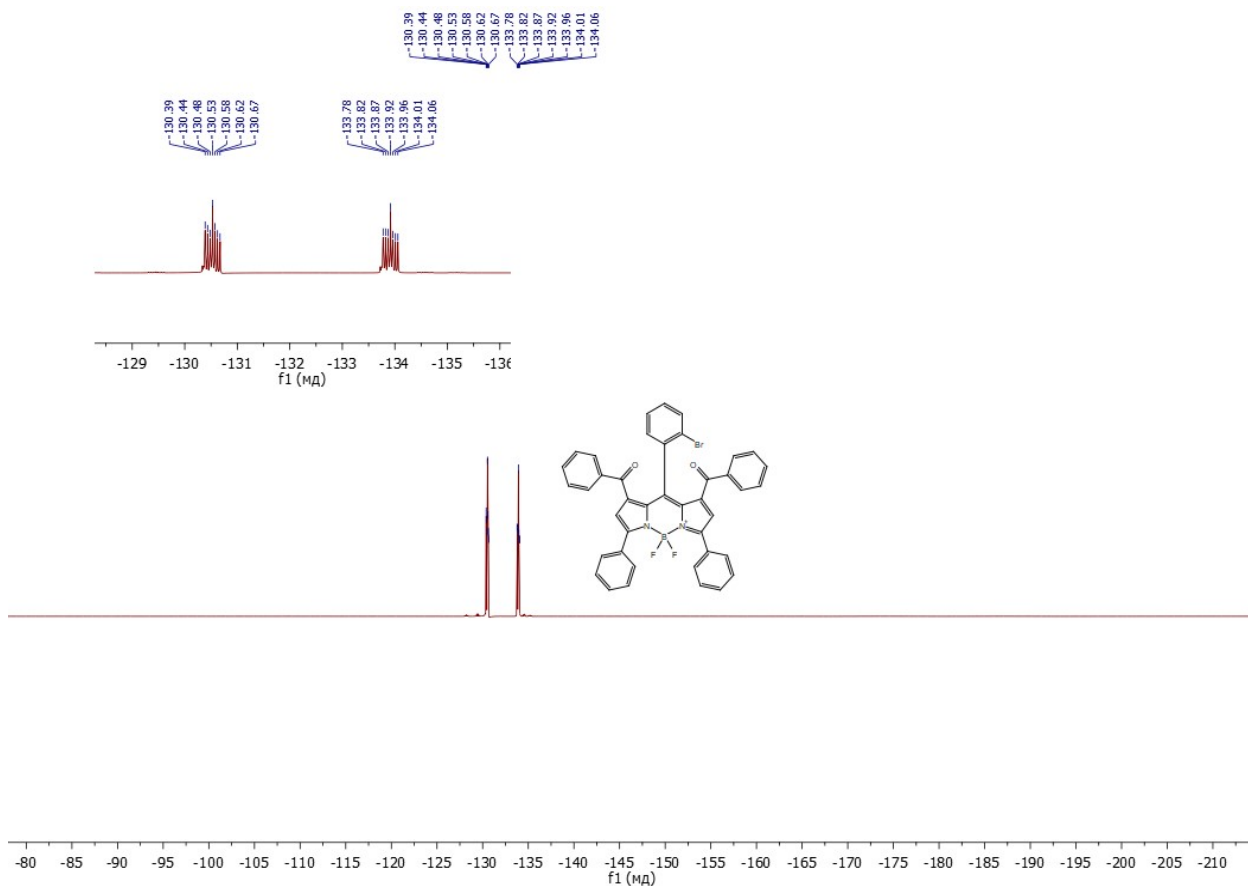

### <sup>1</sup>H NMR spectrum of **4f**

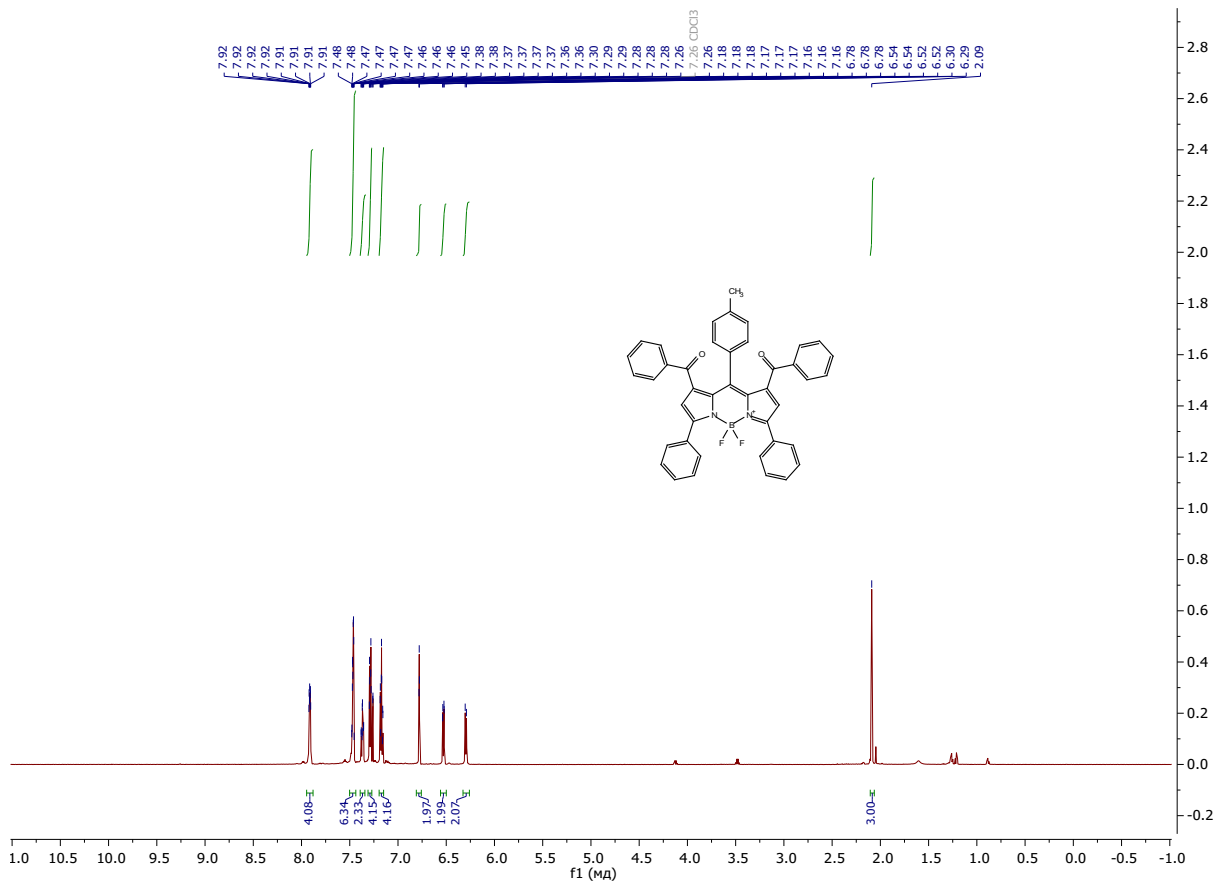

### $^{13}\text{C}$ NMR spectrum of **4f**

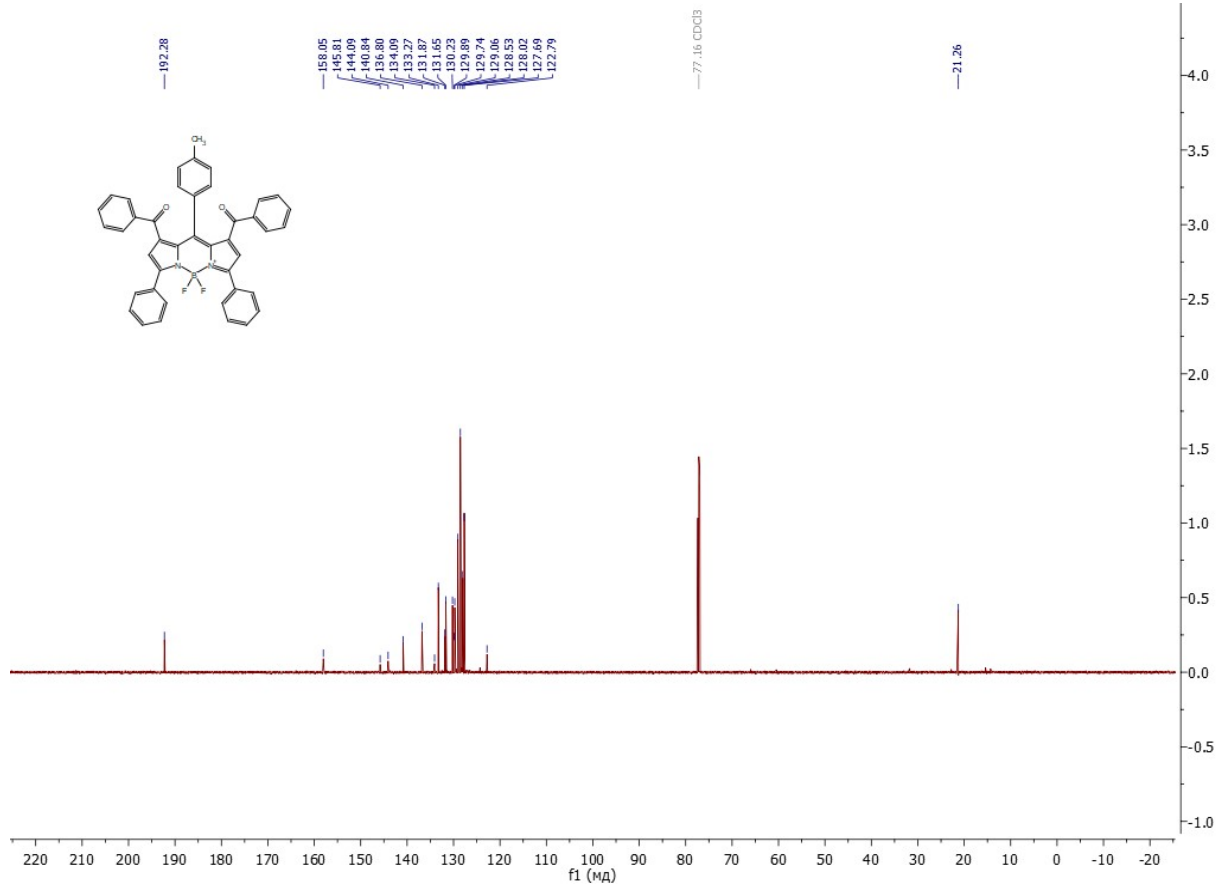

### $^{19}\text{F}$ NMR spectrum of **4f**

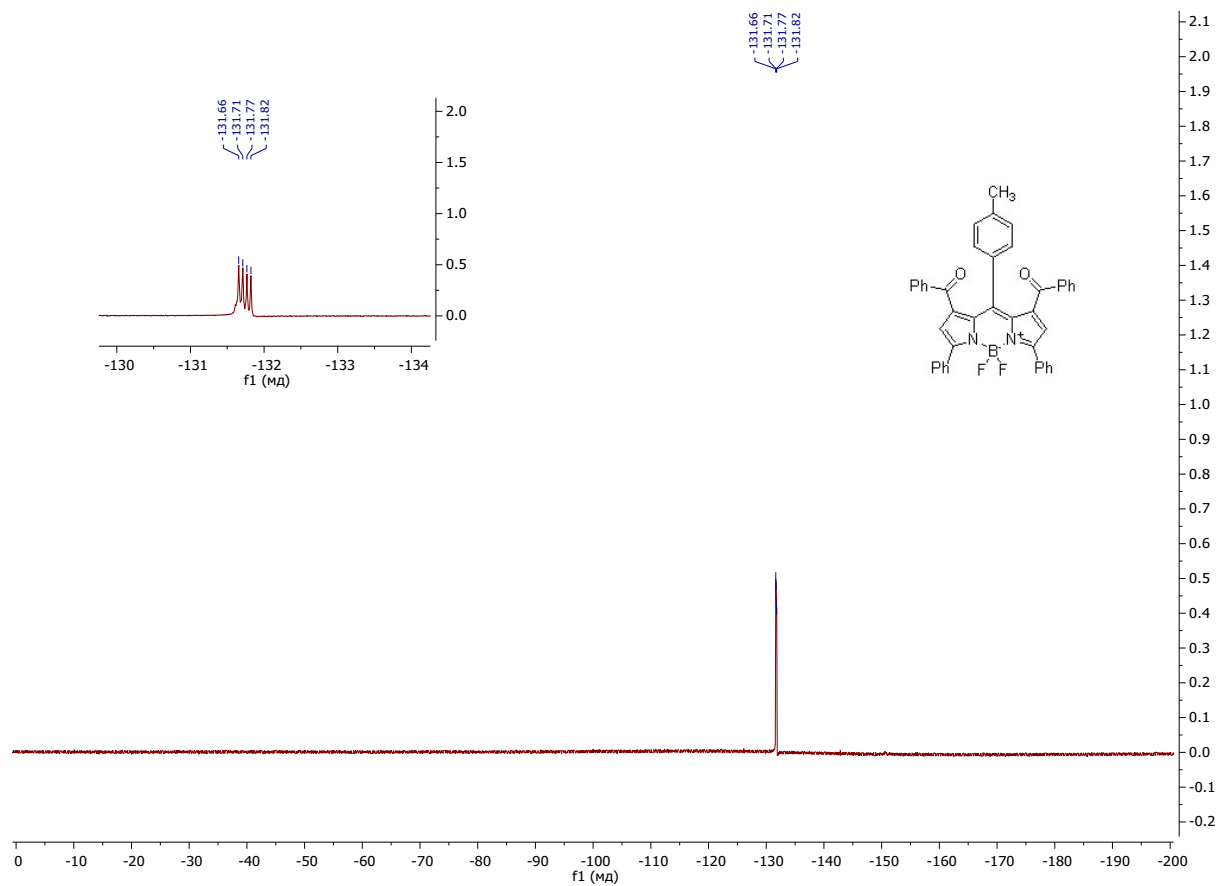

### <sup>1</sup>H NMR spectrum of **4g**

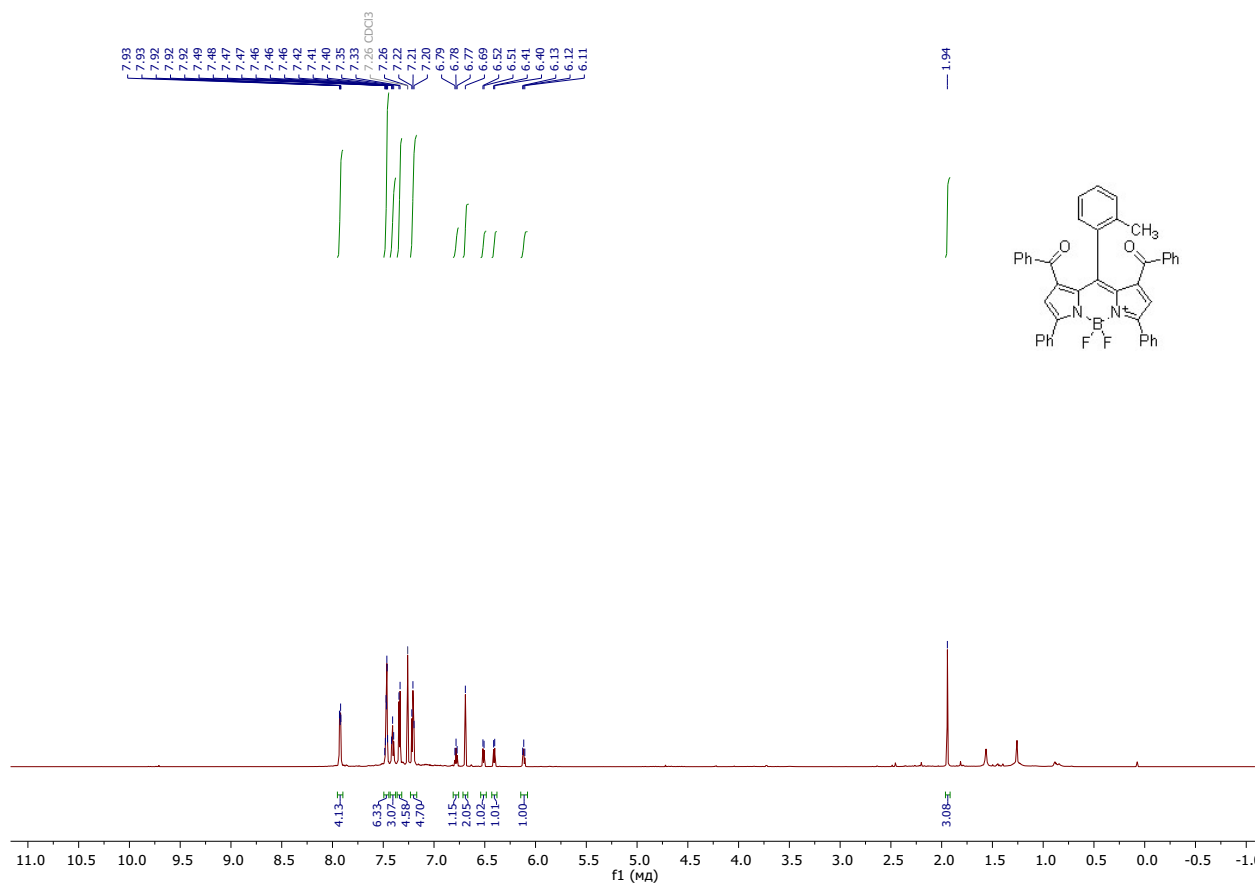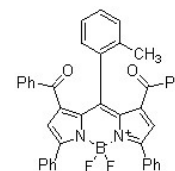

### <sup>13</sup>C NMR spectrum of **4g**

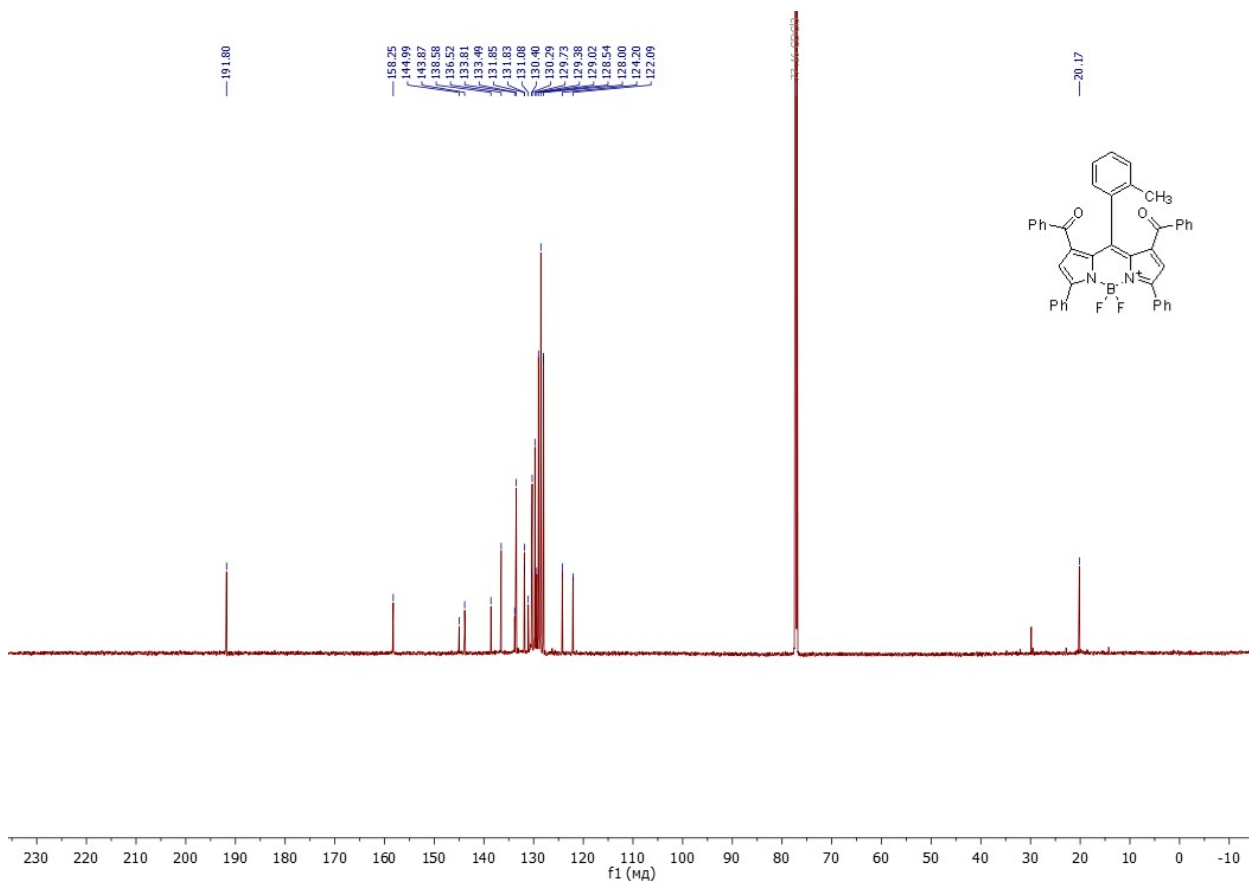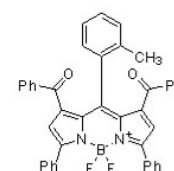

### $^{19}\text{F}$ NMR spectrum of **4g**

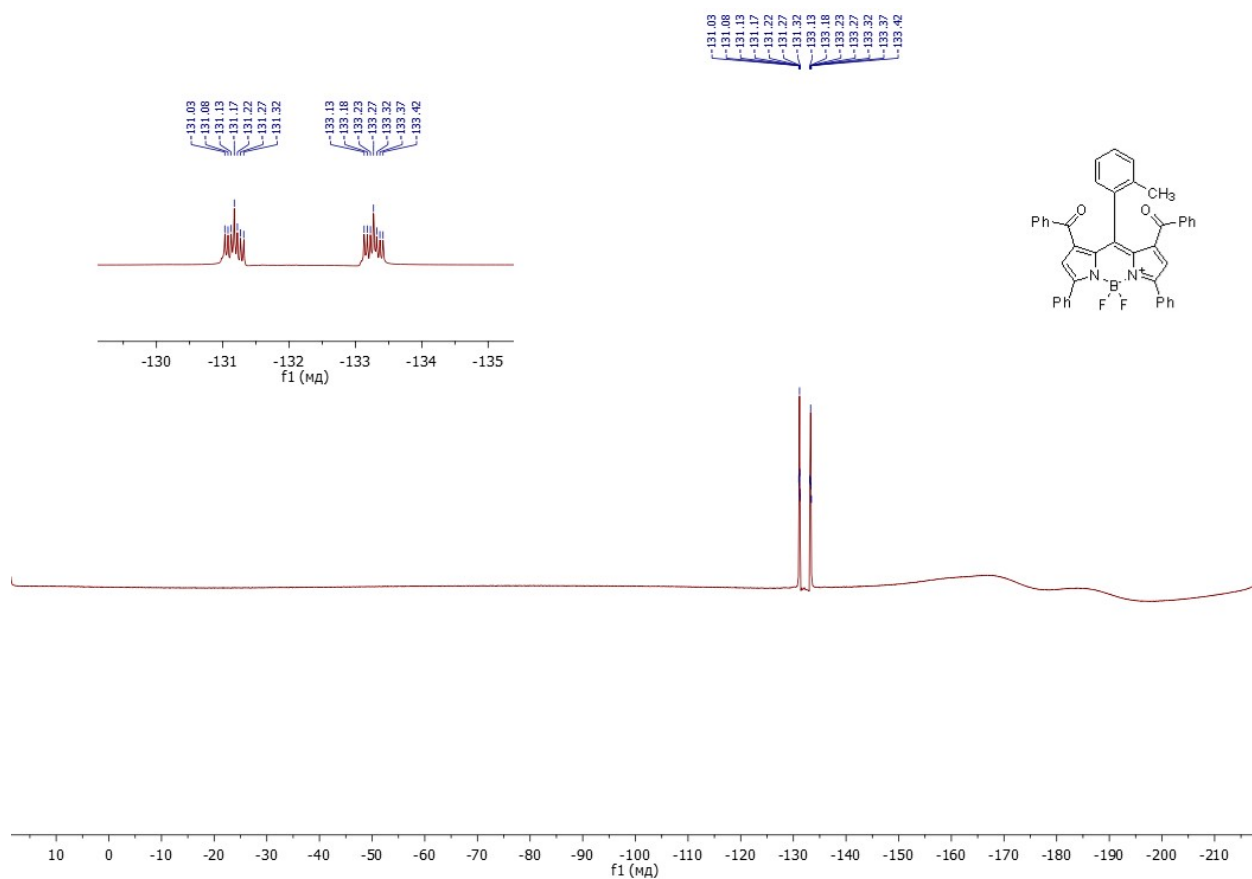

### $^1\text{H}$ NMR spectrum of **4h**

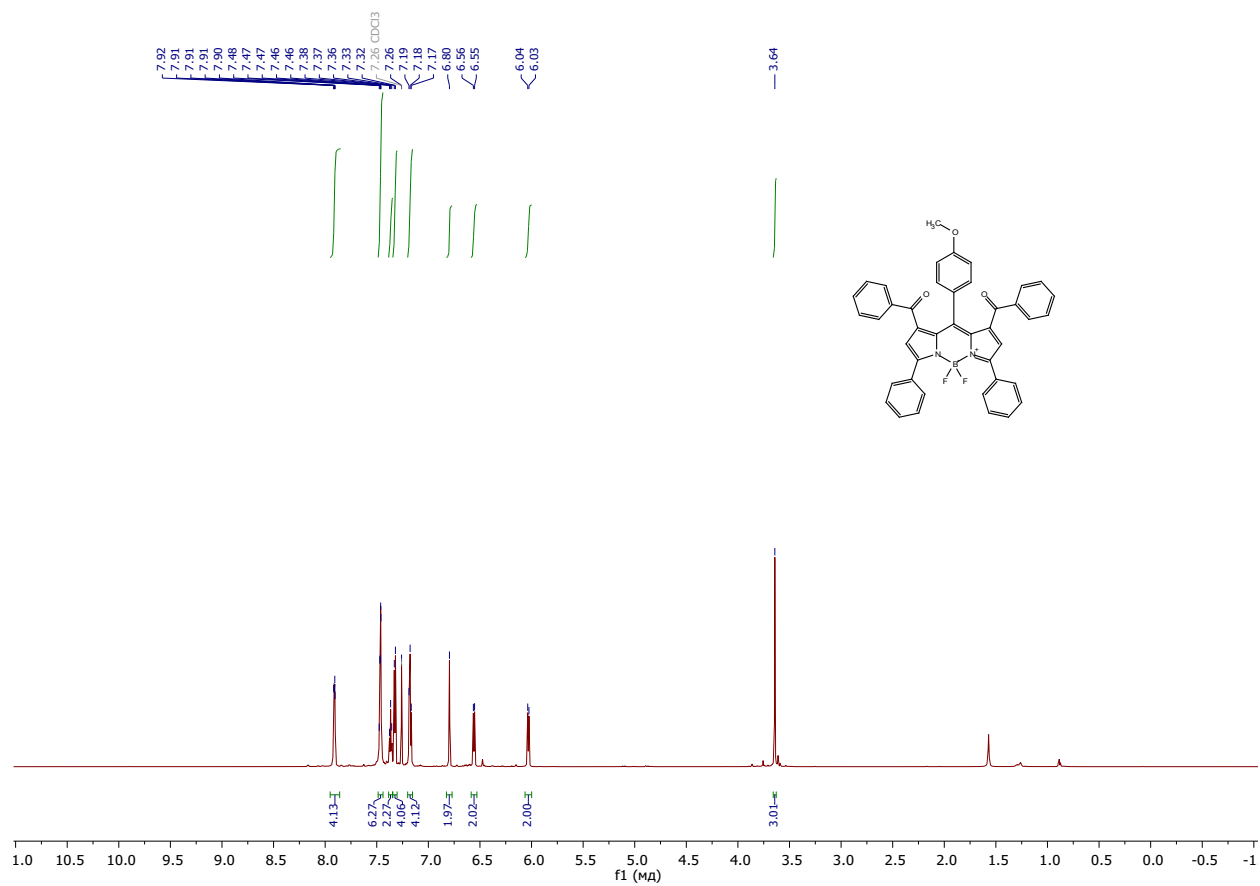

### $^{13}\text{C}$ NMR spectrum of **4h**

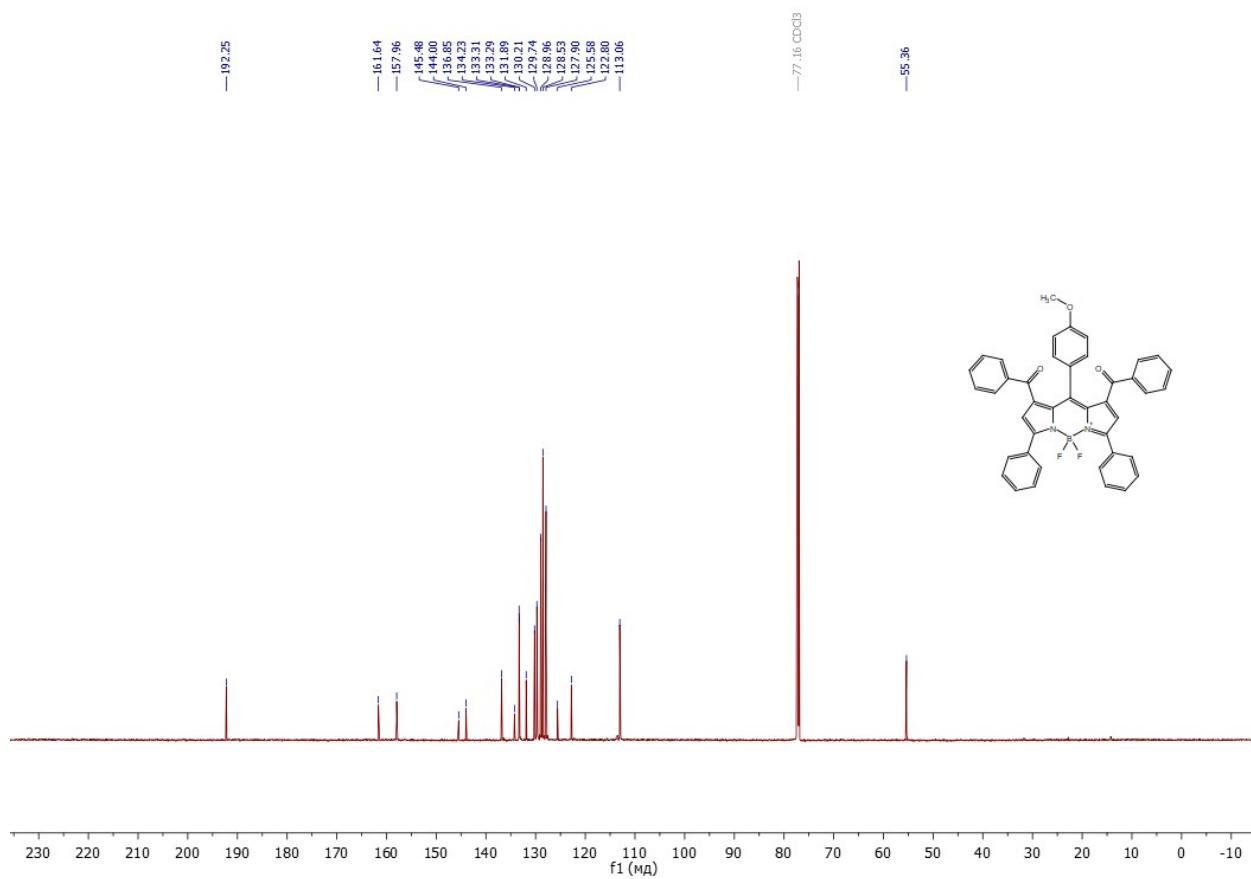

### $^{19}\text{F}$ NMR spectrum of **4h**

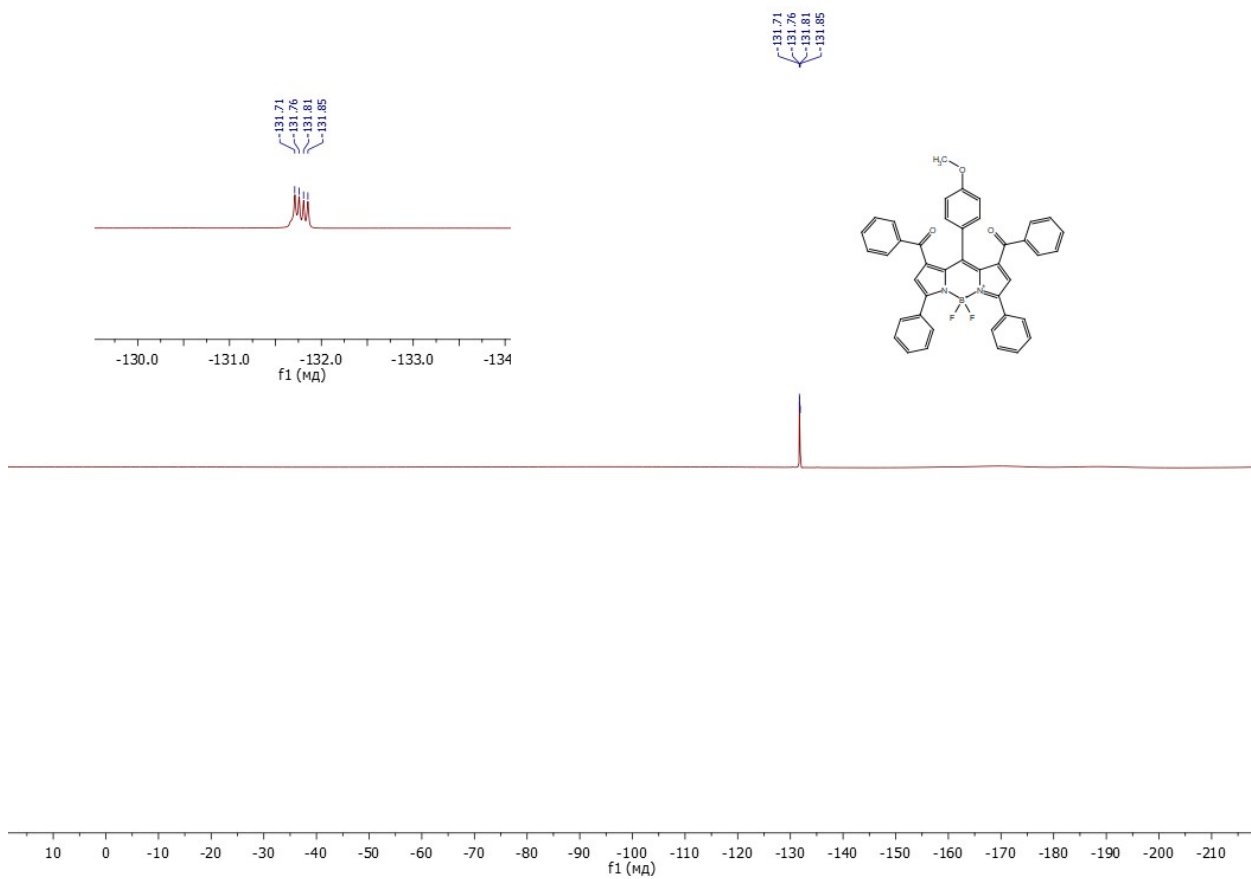



### $^{19}\text{F}$ NMR spectrum of **4i**

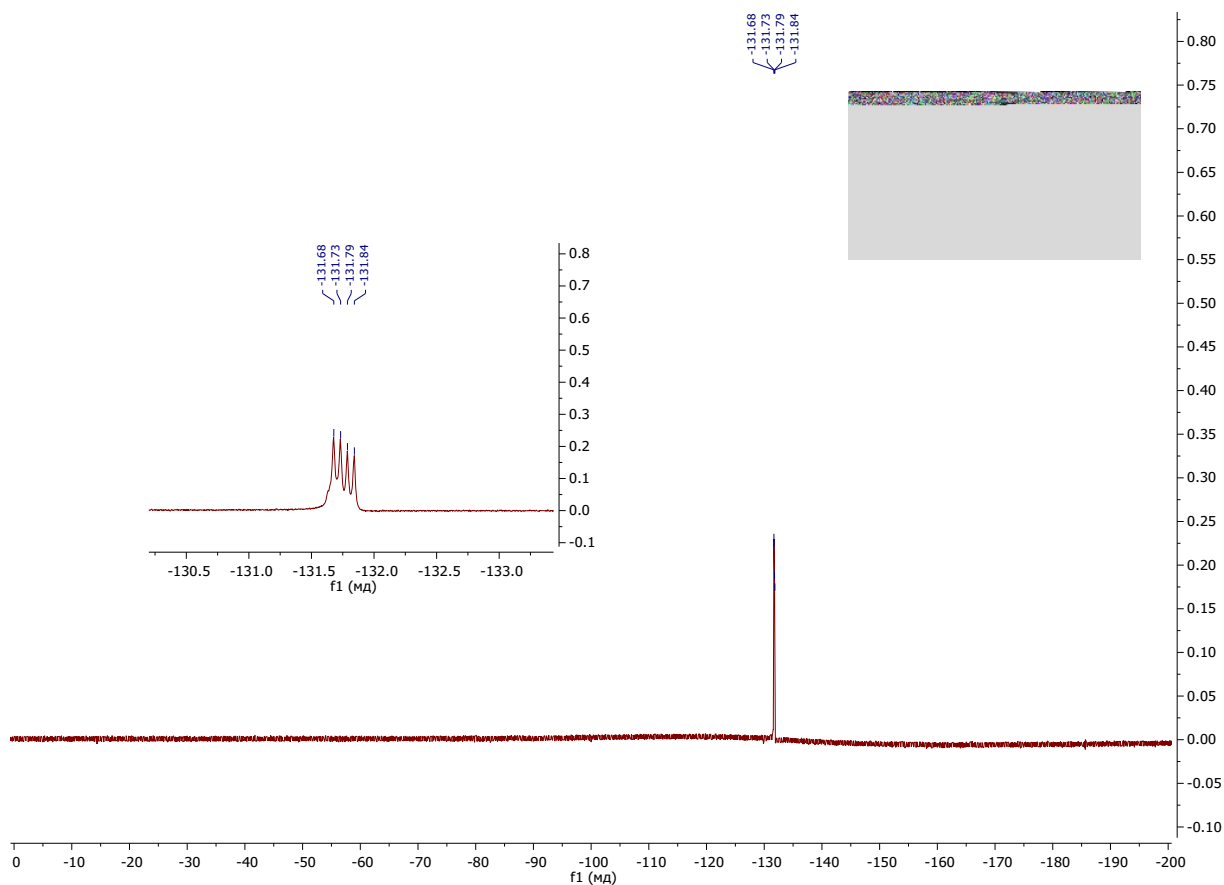

### $^1\text{H}$ NMR spectrum of **4j**

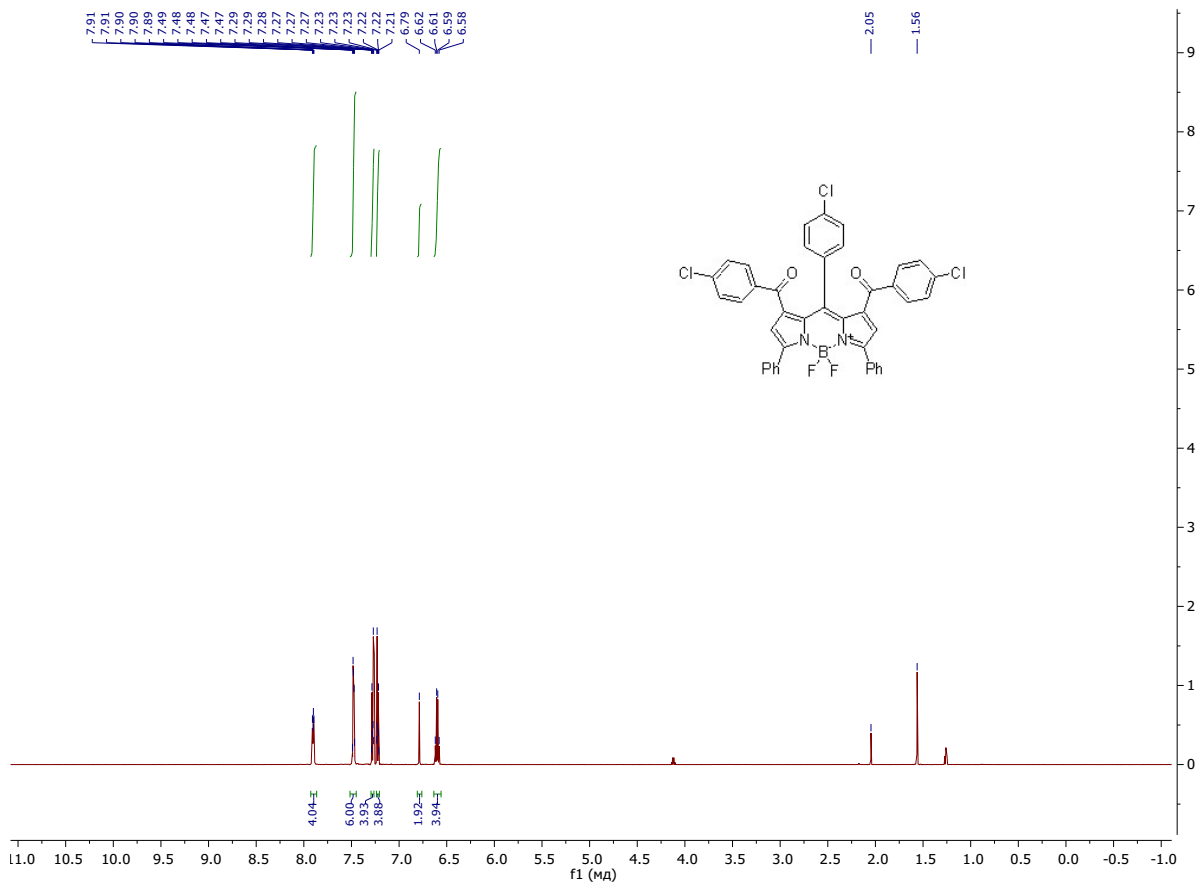



### $^{13}\text{C}$ NMR spectrum of **4j**

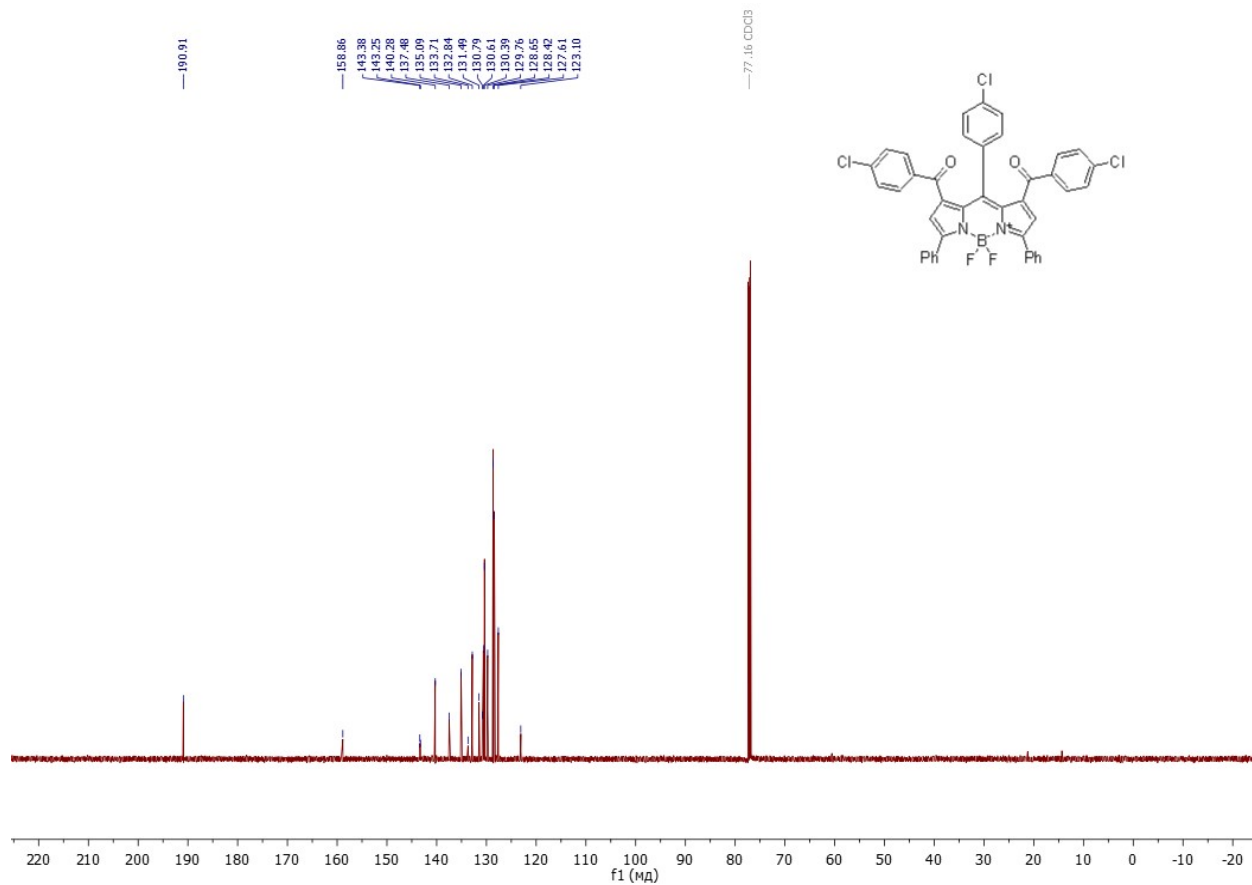

### $^{19}\text{F}$ NMR spectrum of **4j**

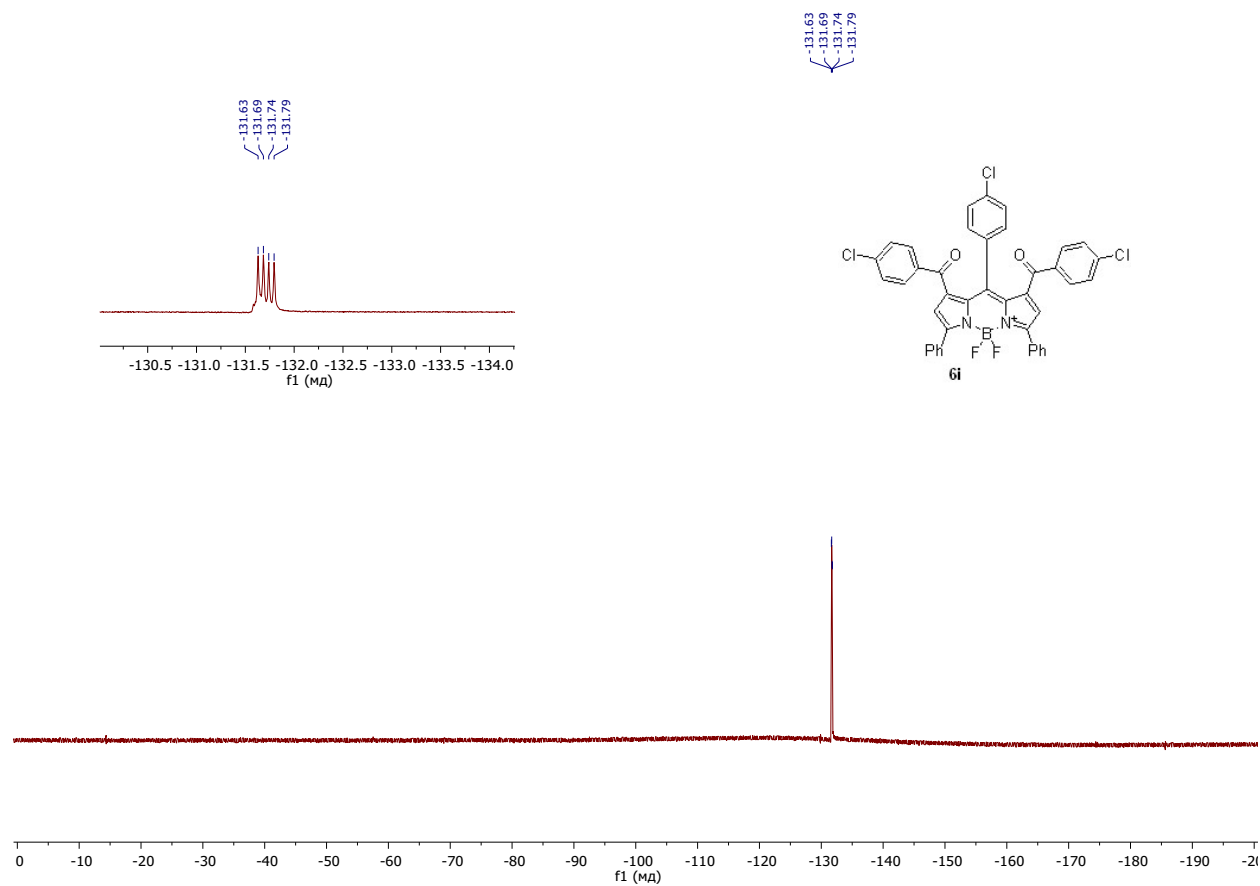

### <sup>1</sup>H NMR spectrum of **4k**

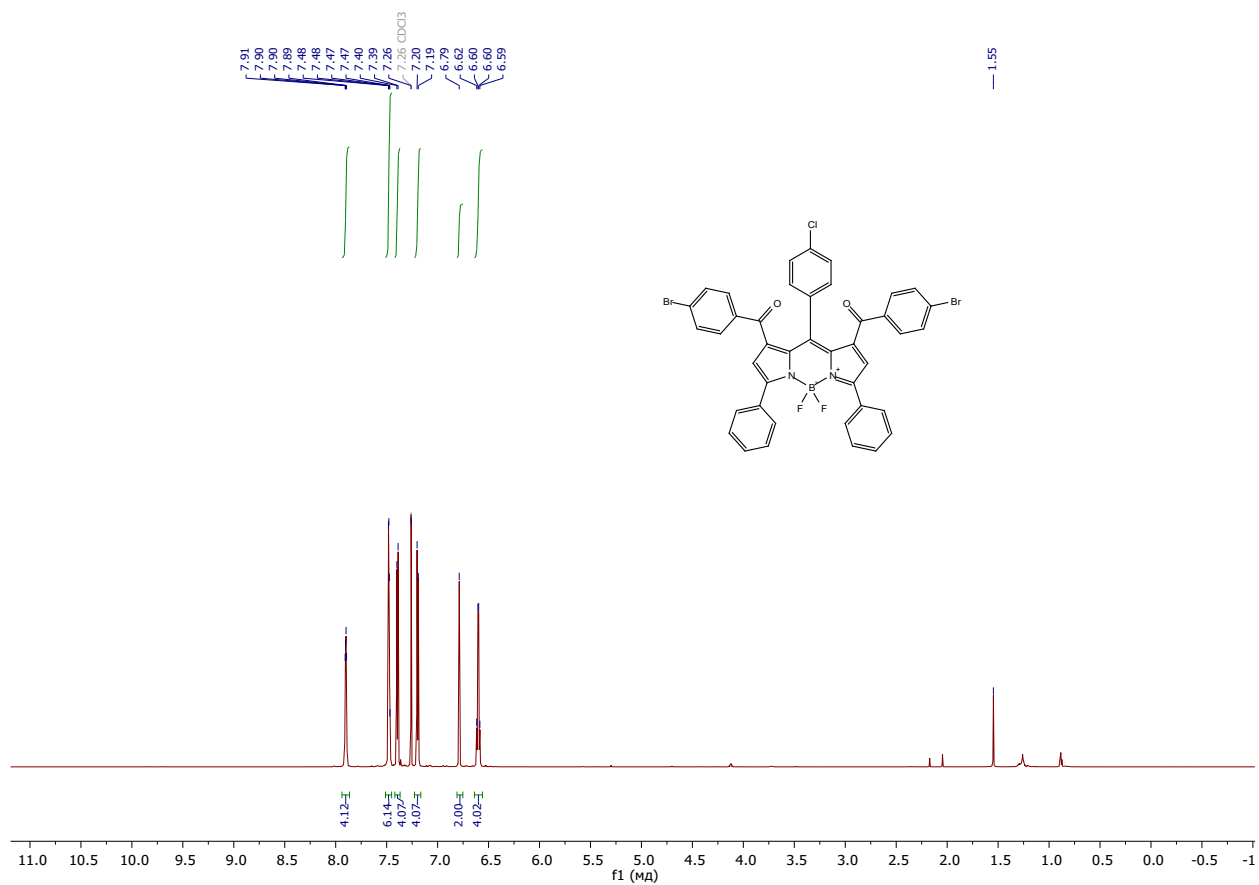

### <sup>13</sup>C NMR spectrum of **4k**

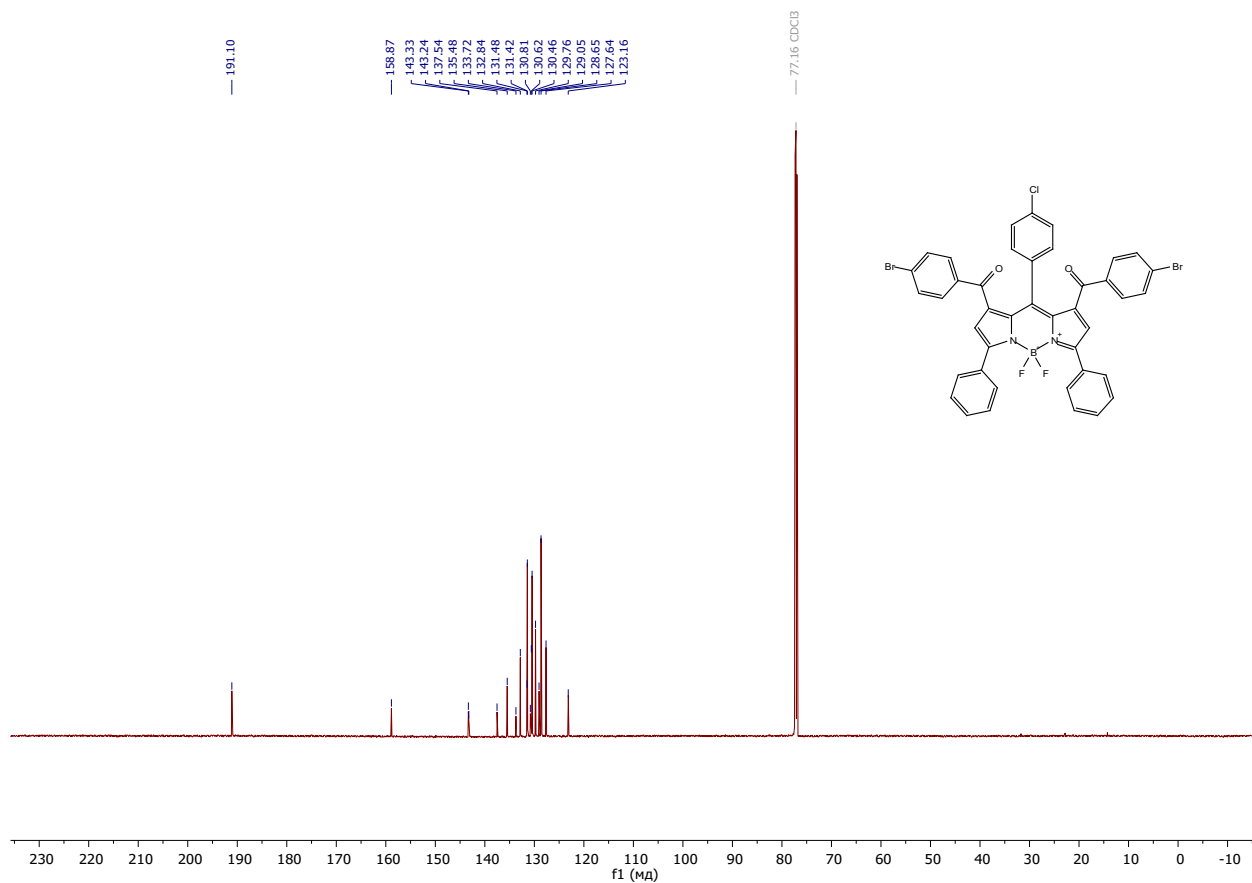

# $^{19}\text{F}$ NMR spectrum of 4k

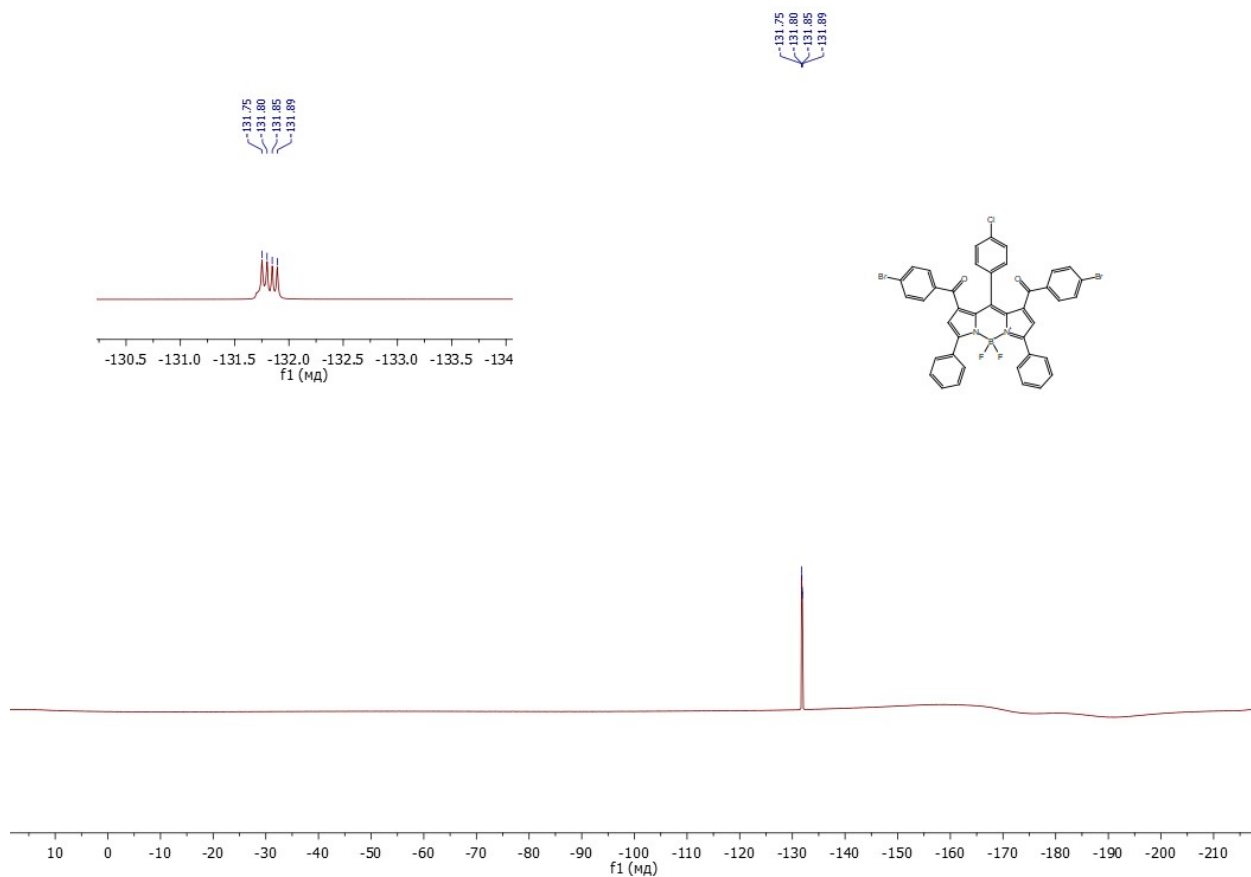

# $^1\text{H}$ NMR spectrum of 4l

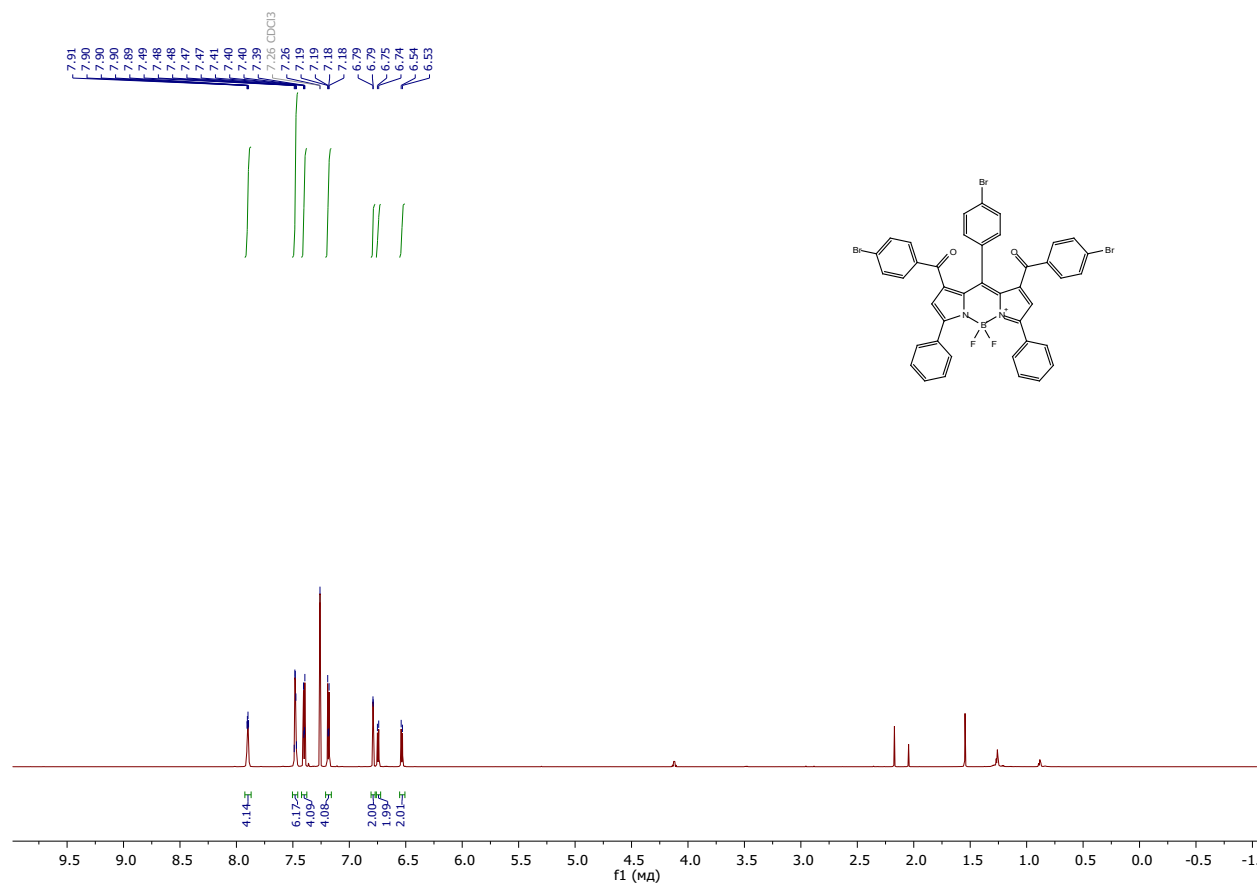

### $^{13}\text{C}$ NMR spectrum of **4I**

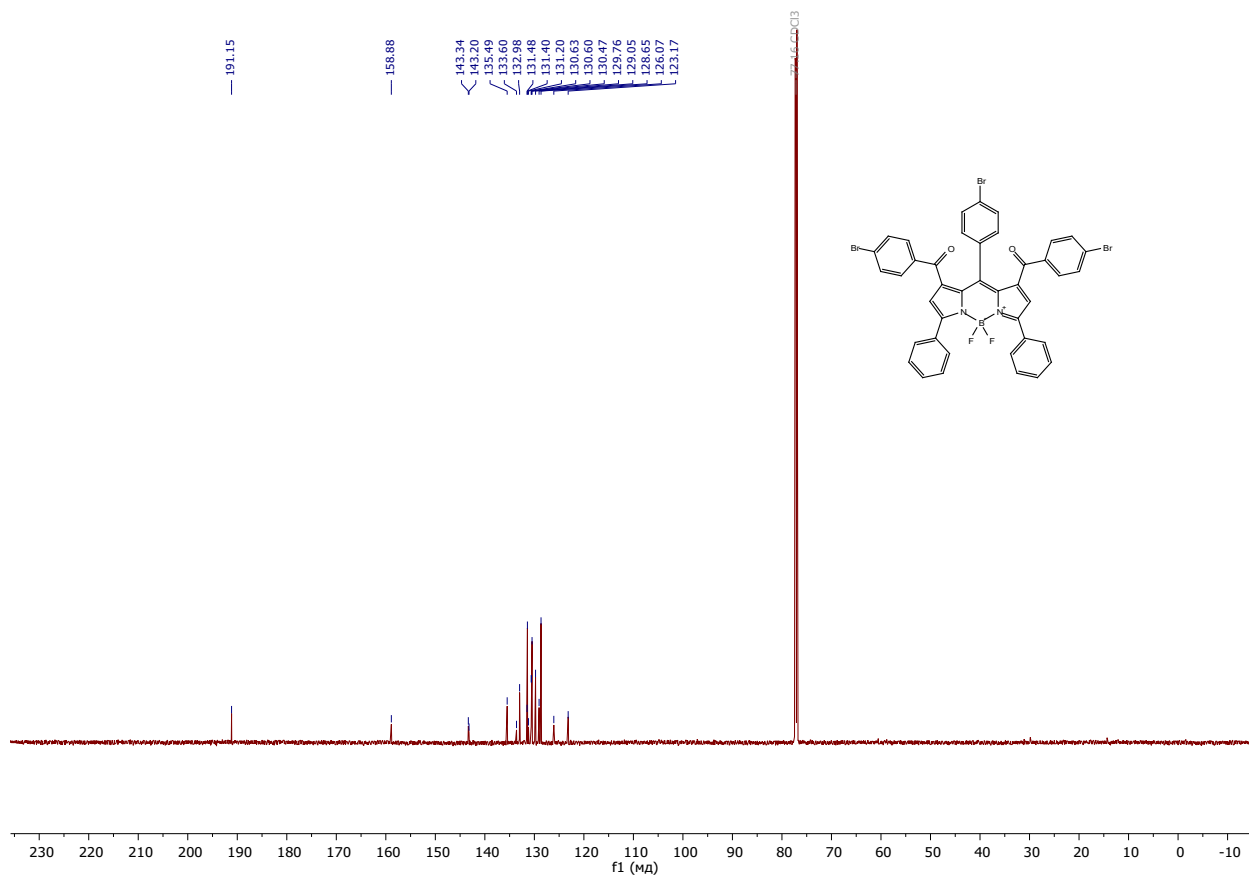

### $^{19}\text{F}$ NMR spectrum of **4I**

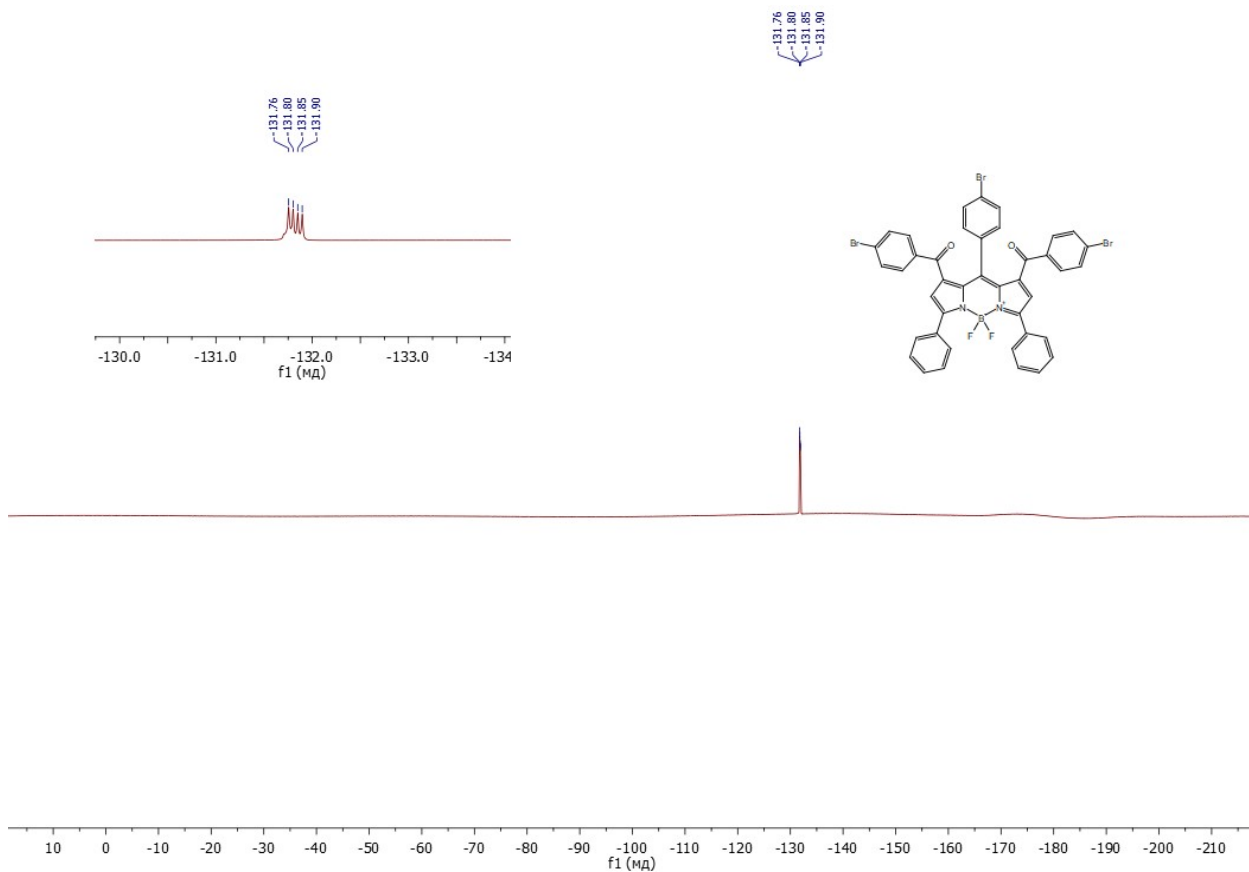

<sup>1</sup>H NMR spectrum of **4m**

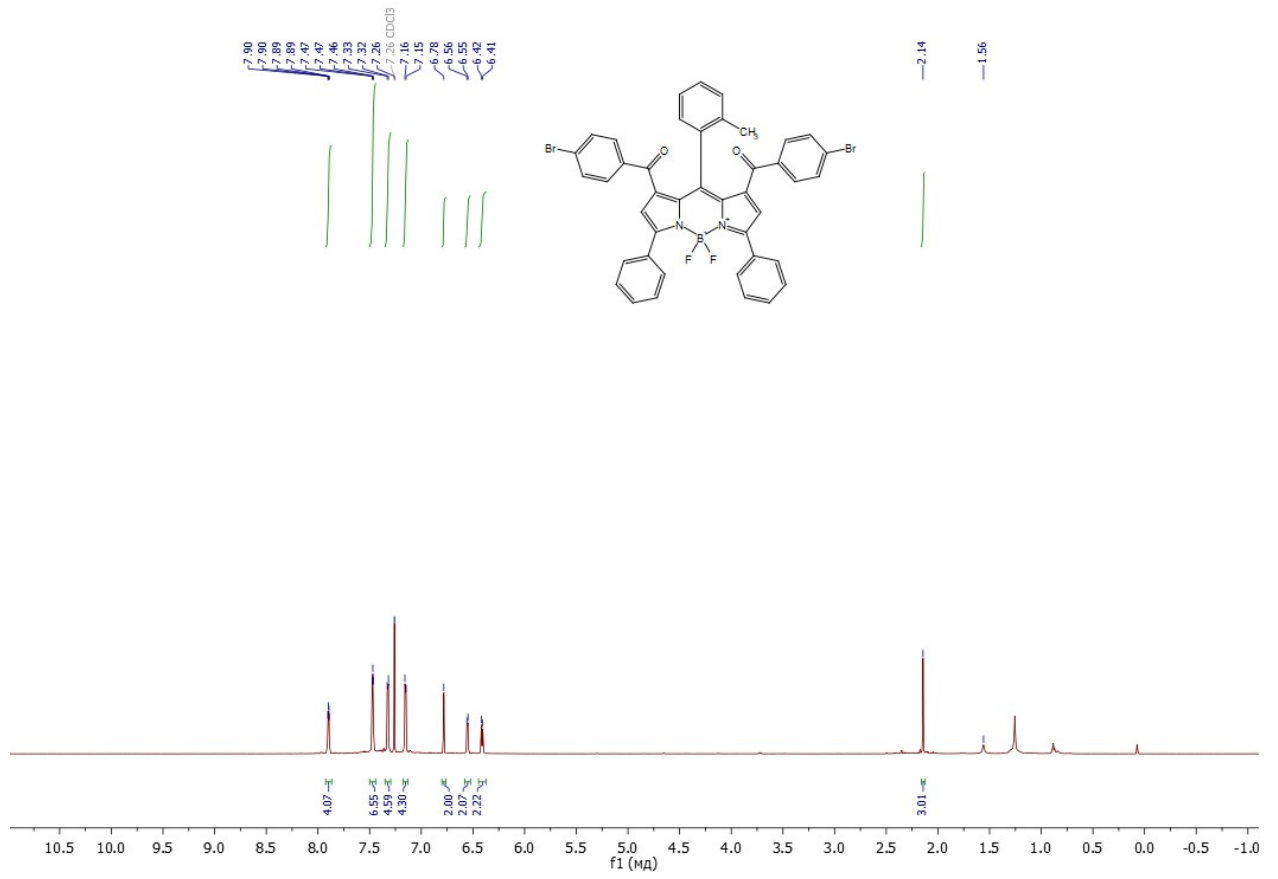

<sup>13</sup>C NMR spectrum of **4m**

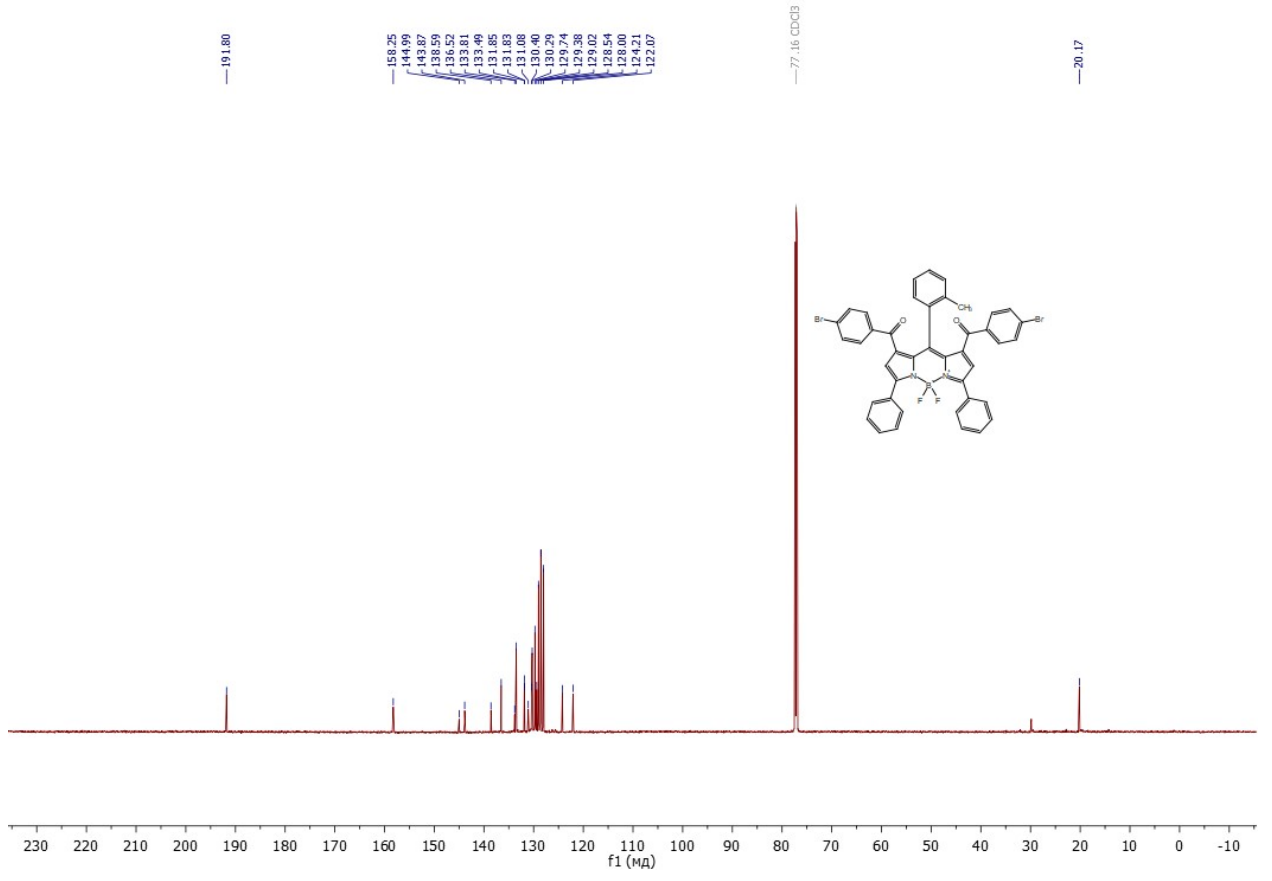

### $^{19}\text{F}$ NMR spectrum of **4m**

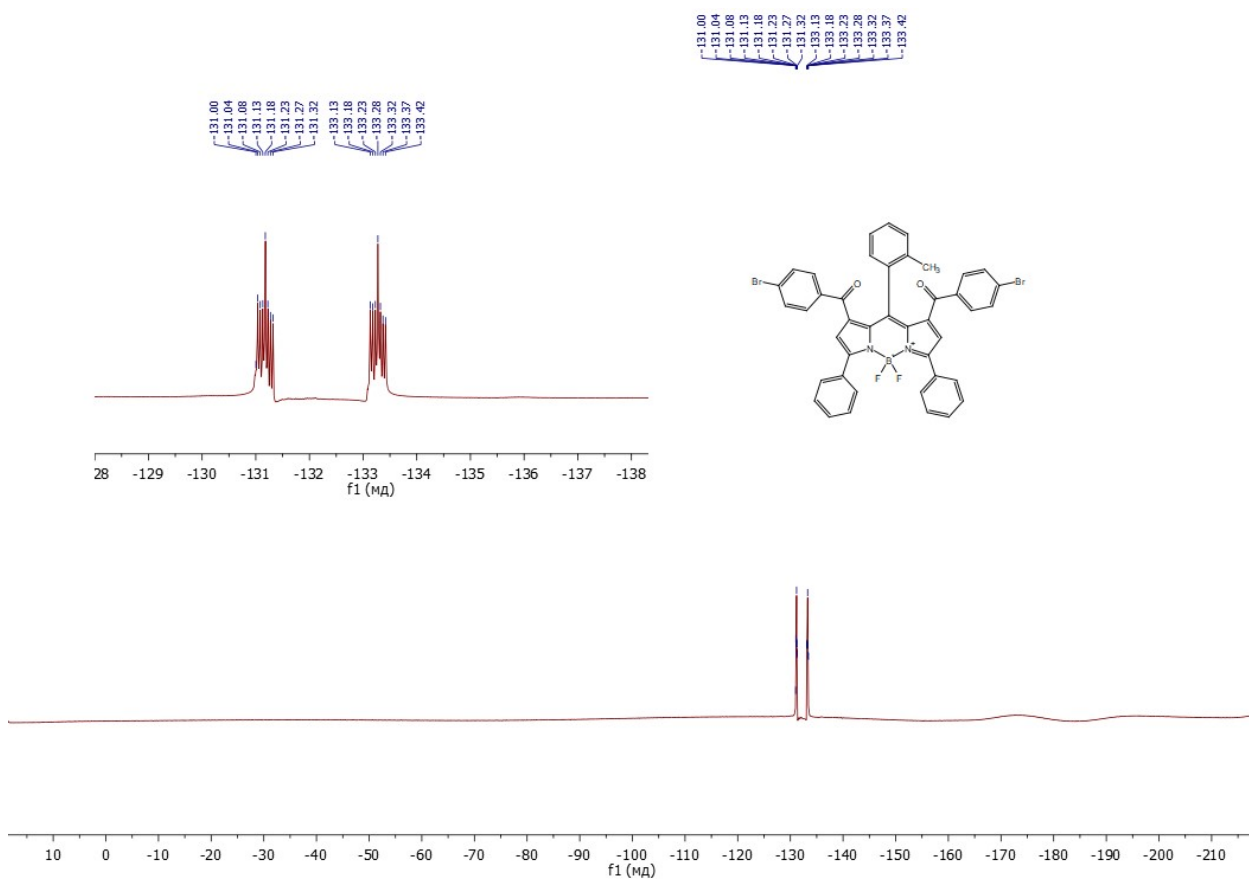

### $^1\text{H}$ NMR spectrum of **4n**

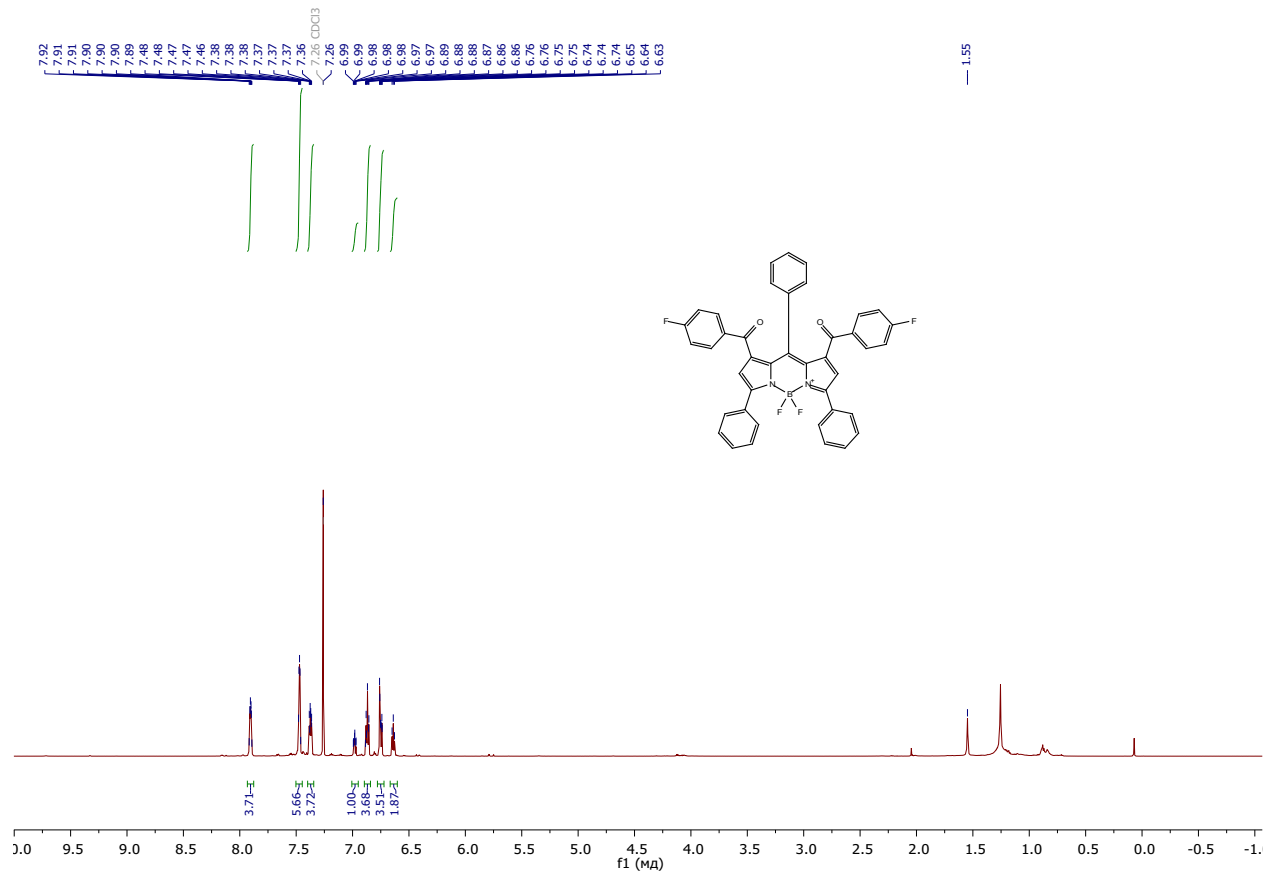



### $^{13}\text{C}$ NMR spectrum of **4n**

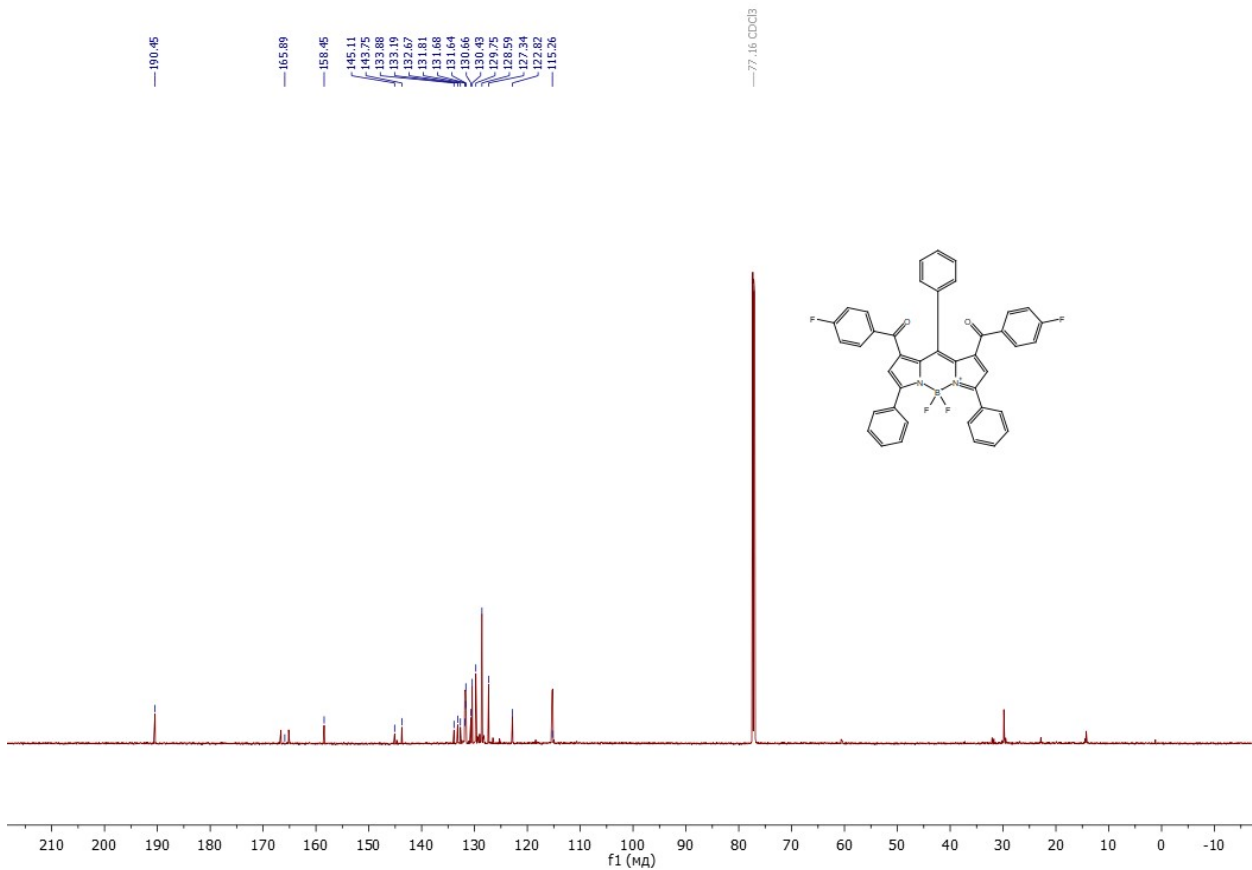

### $^{19}\text{F}$ NMR spectrum of **4n**

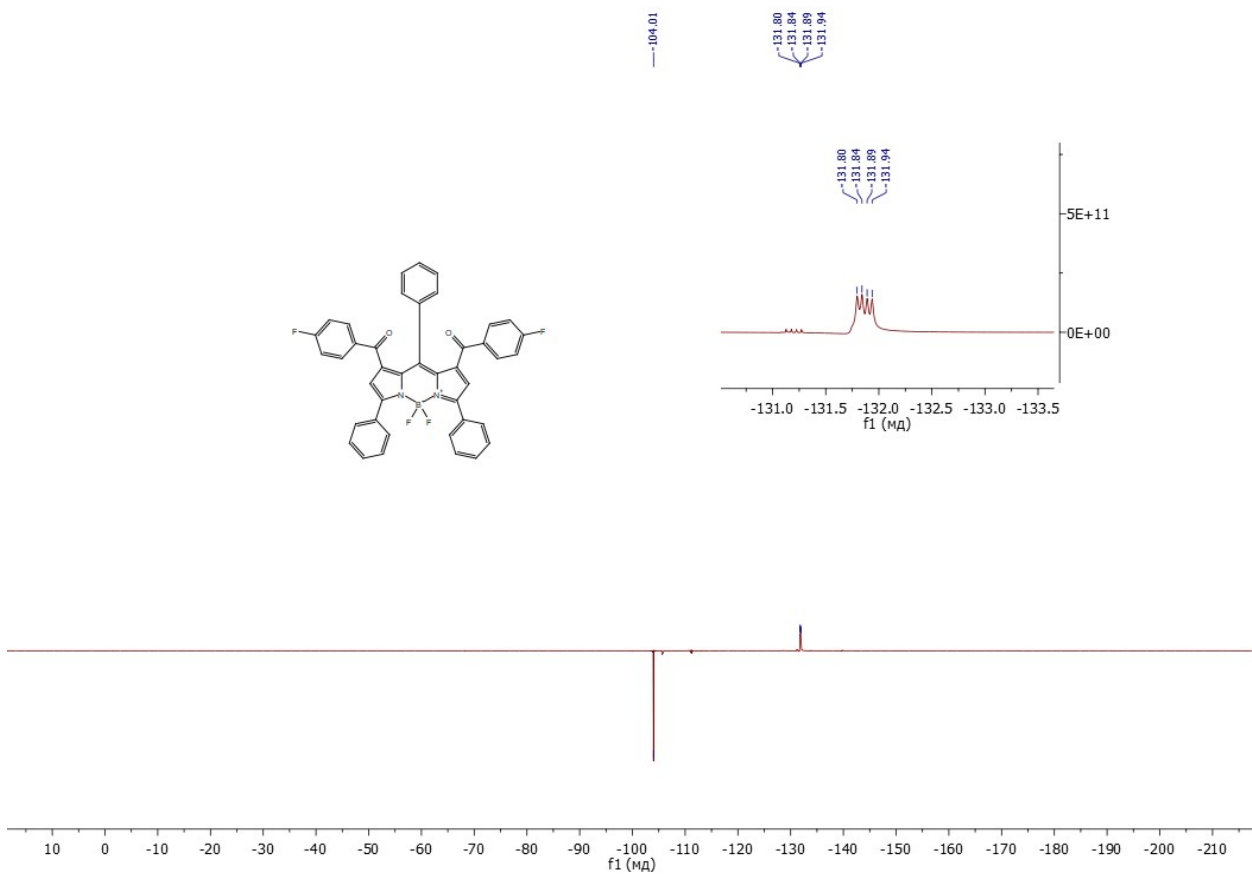

## 2. HRMS

### 4a

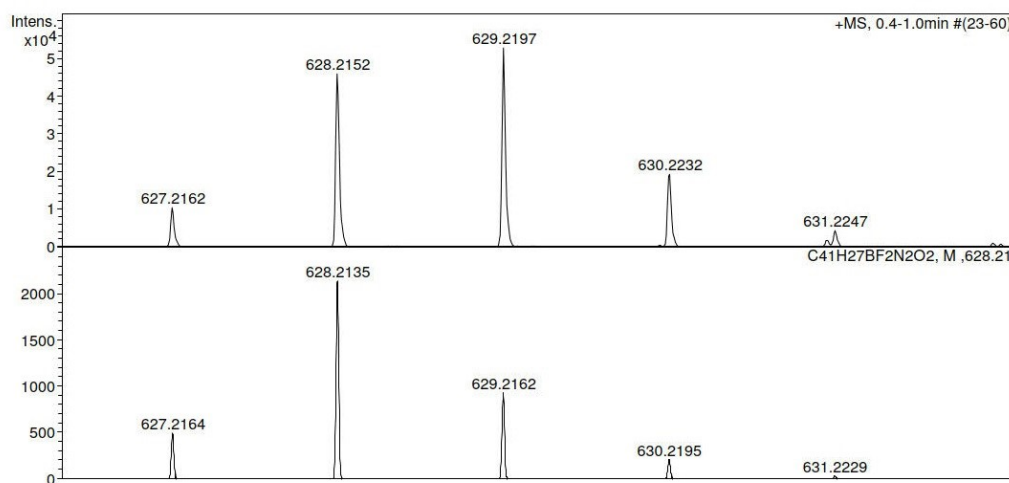

### 4b

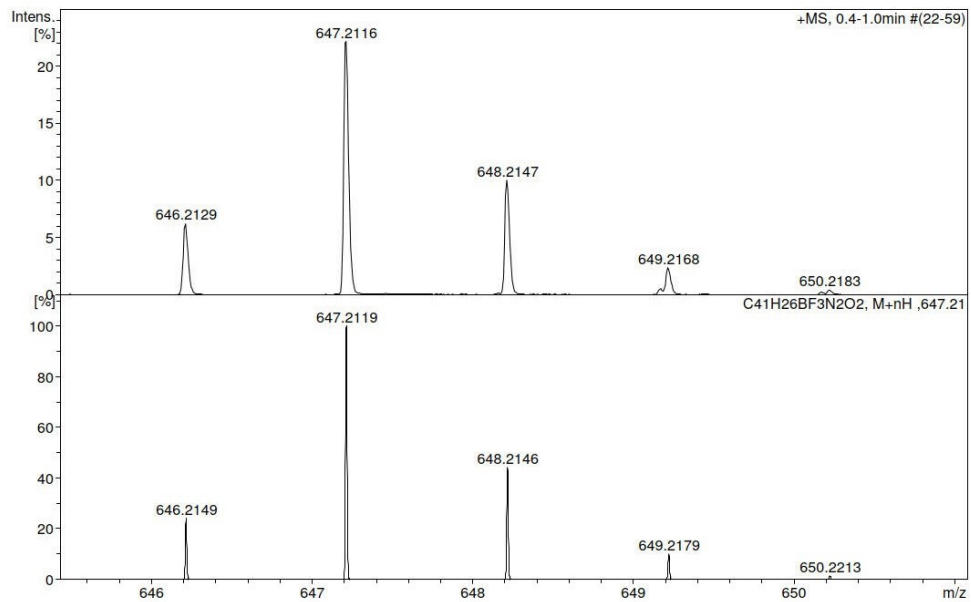

### 4c

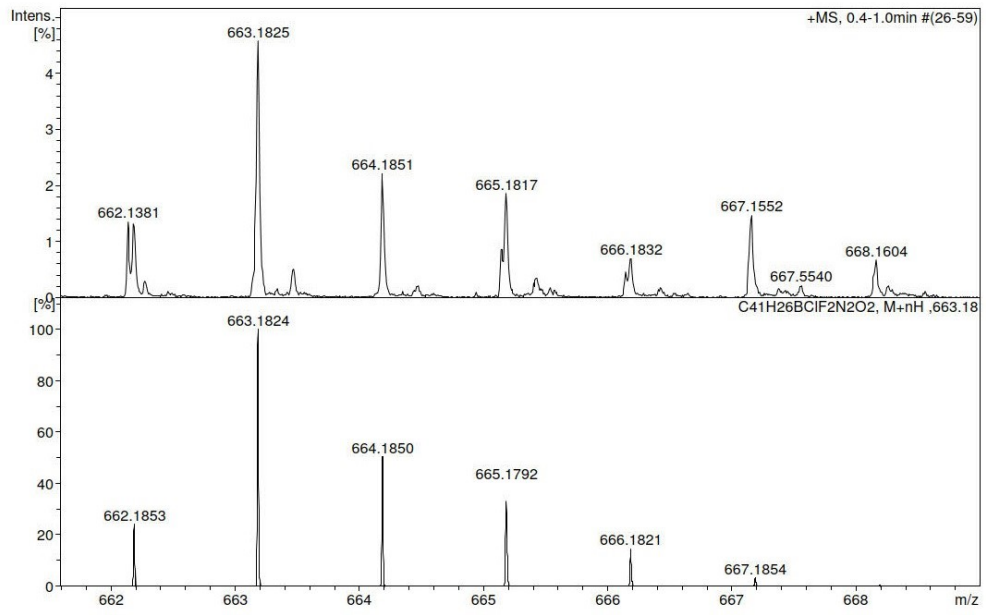

### 4d

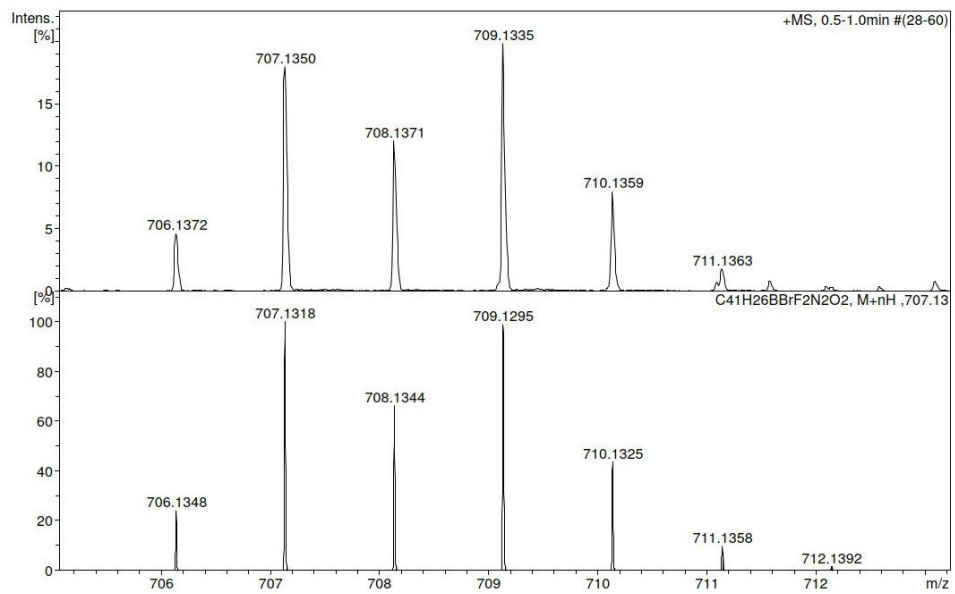

### 4e

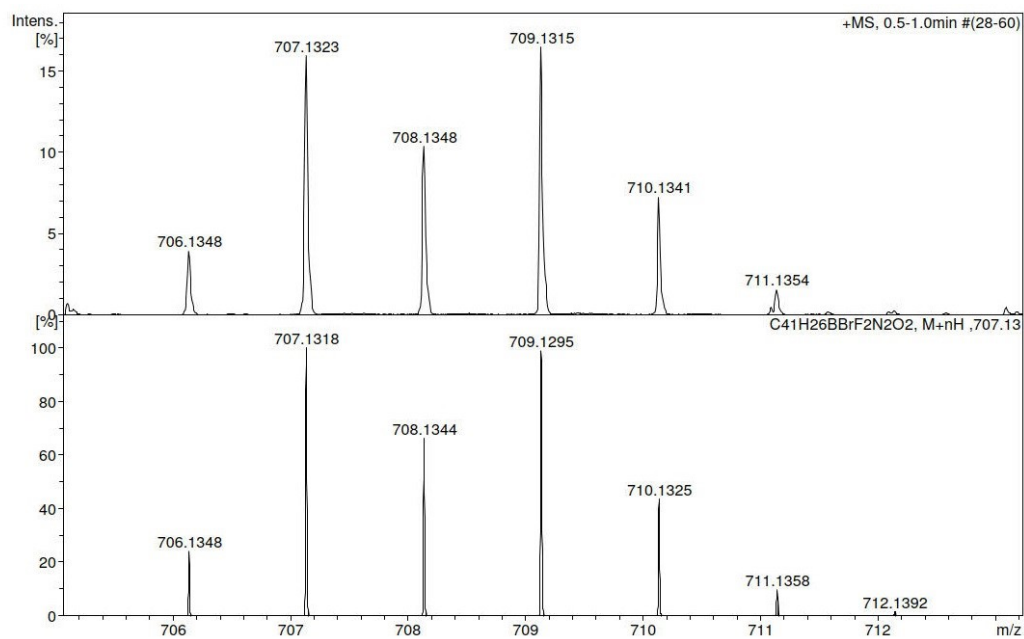

### 4f

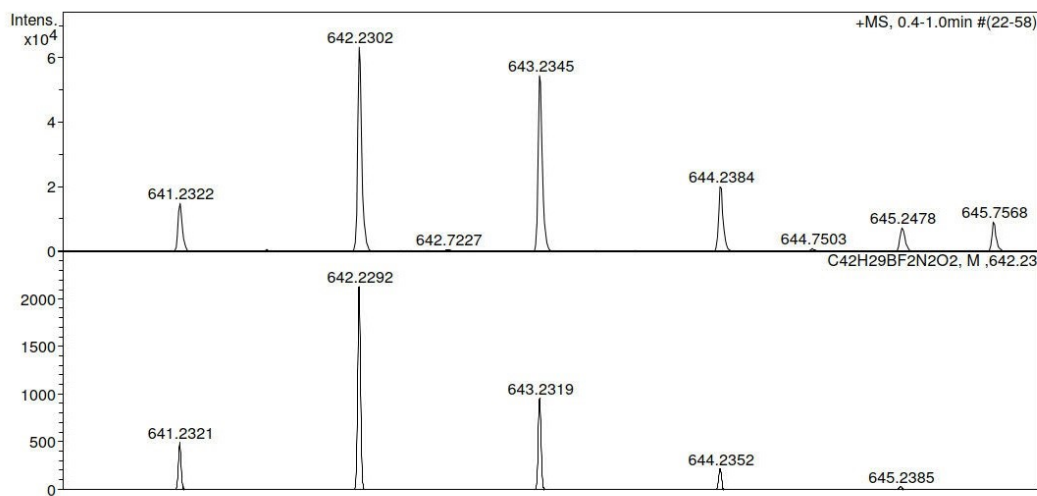

### 4g

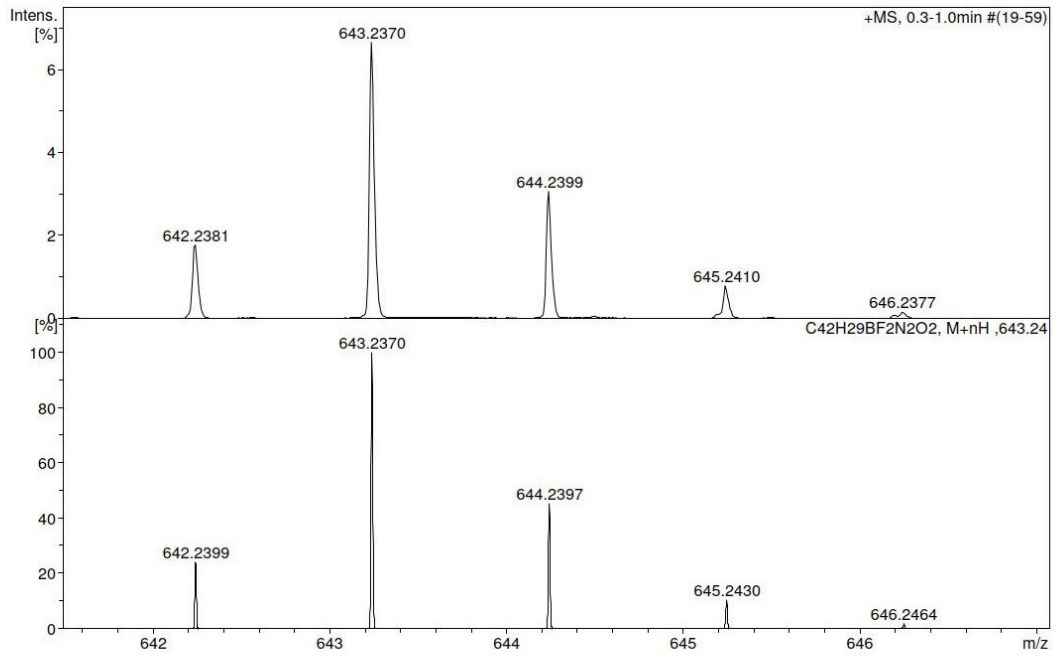

### 4h

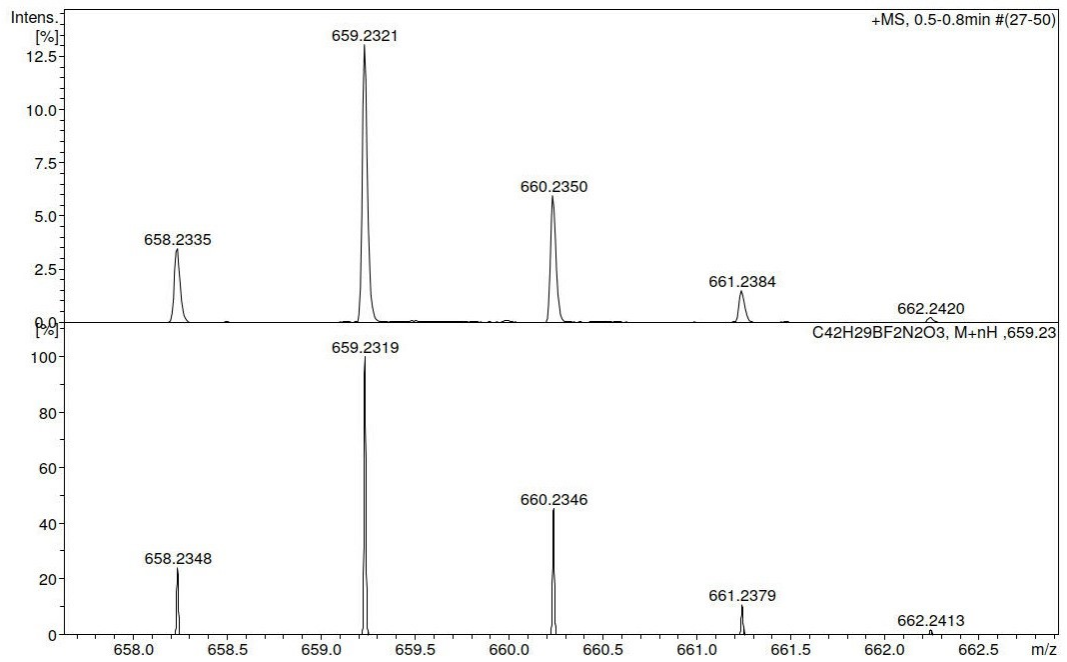

4i

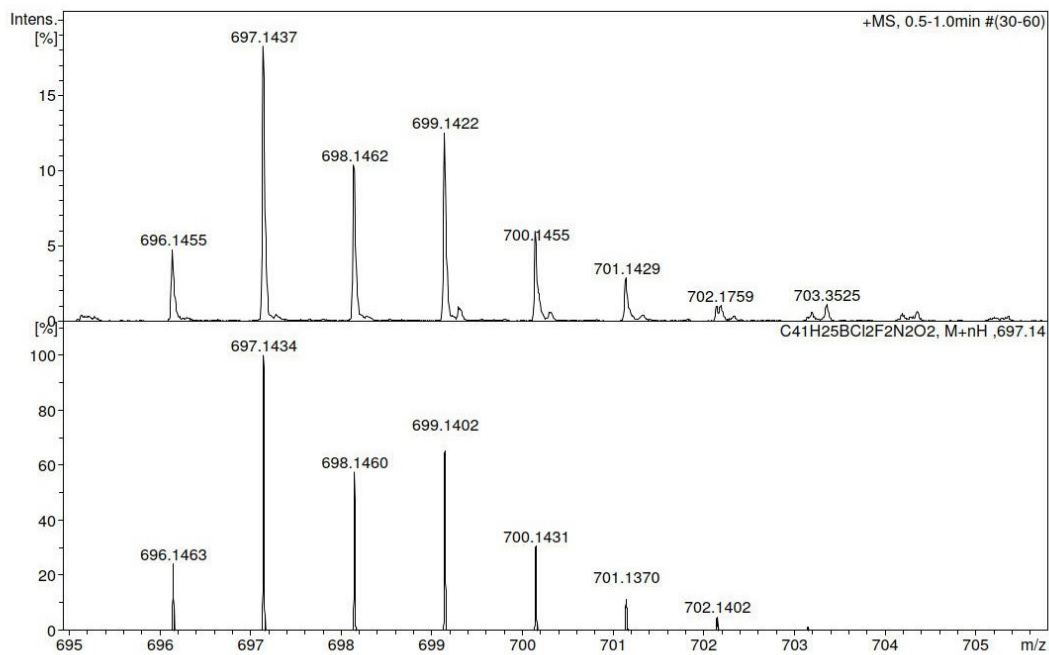

4j

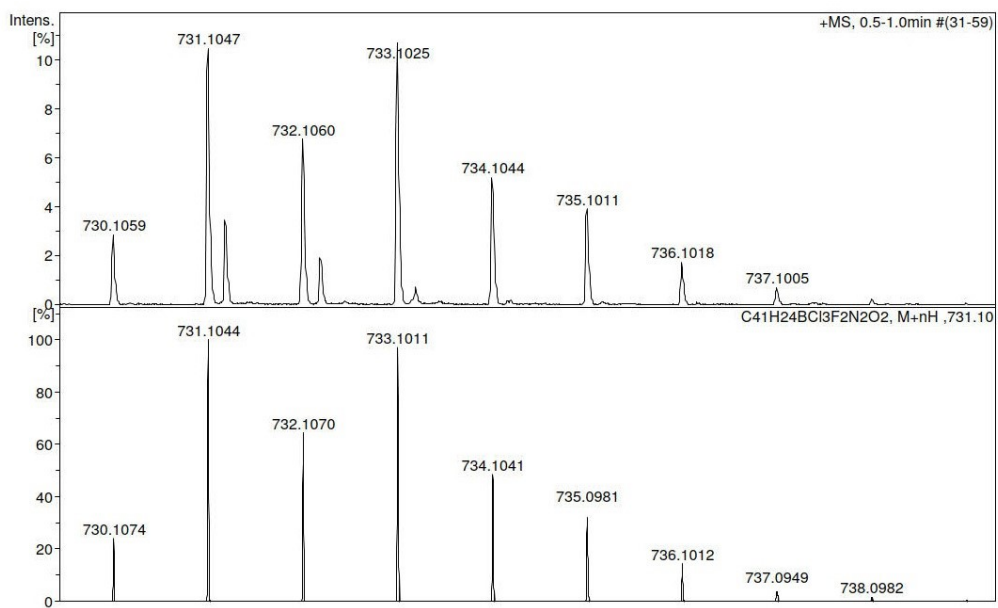

4k

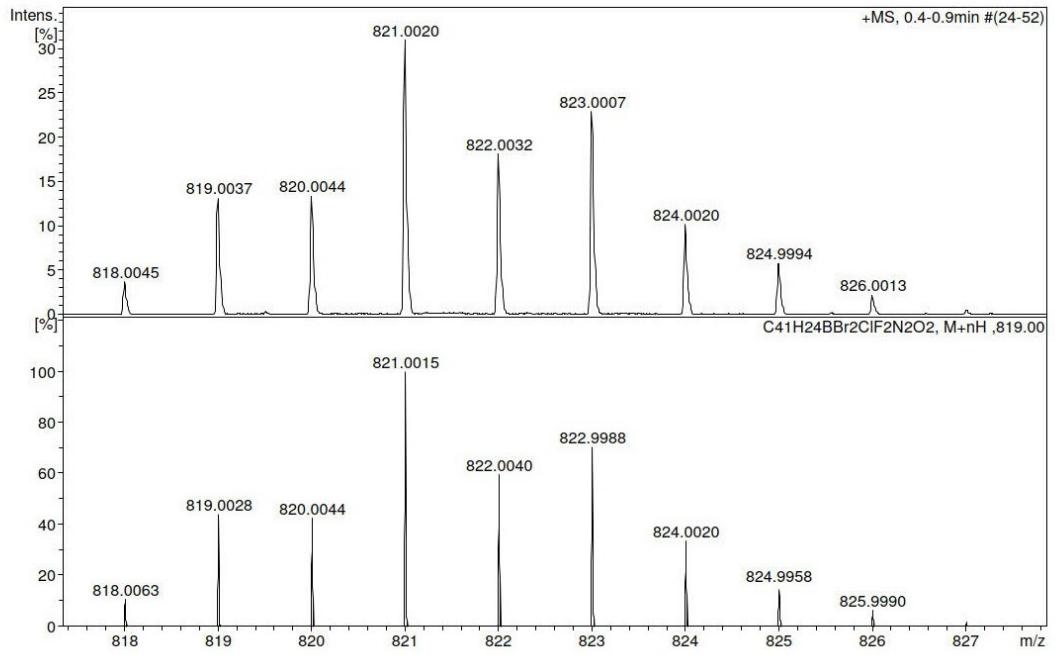

4l

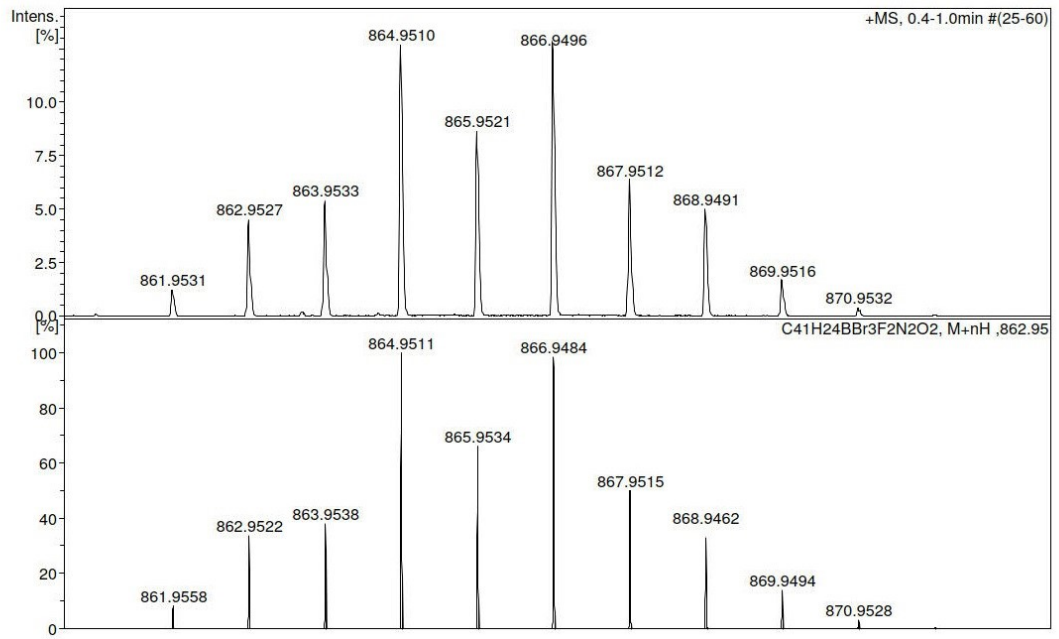

4m

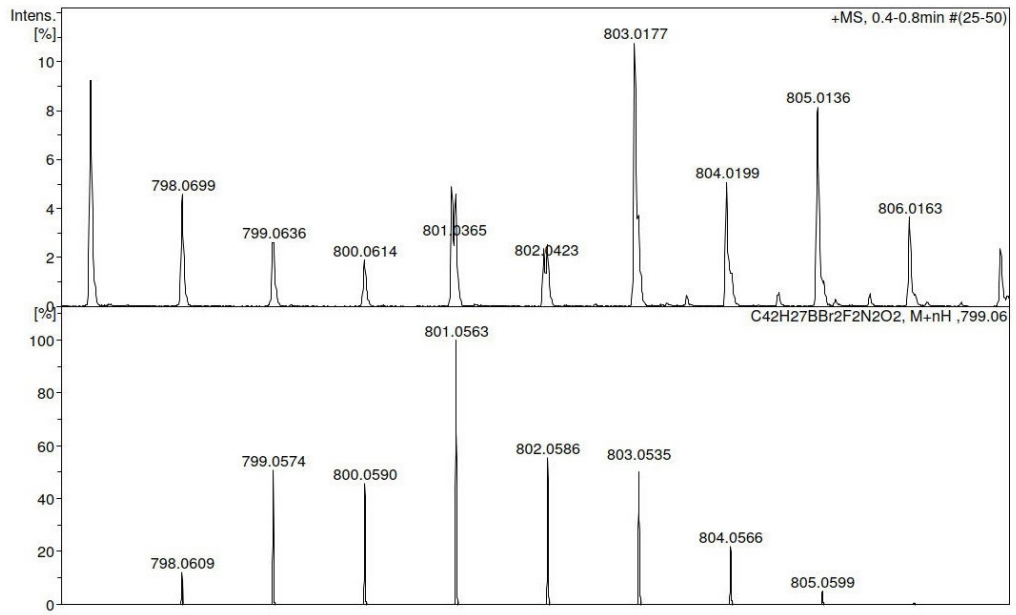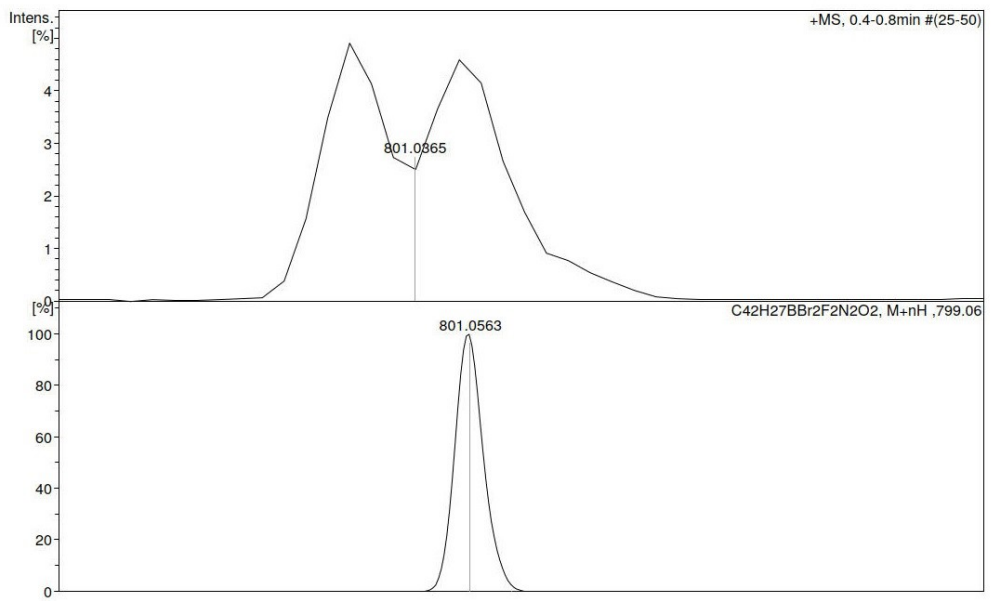



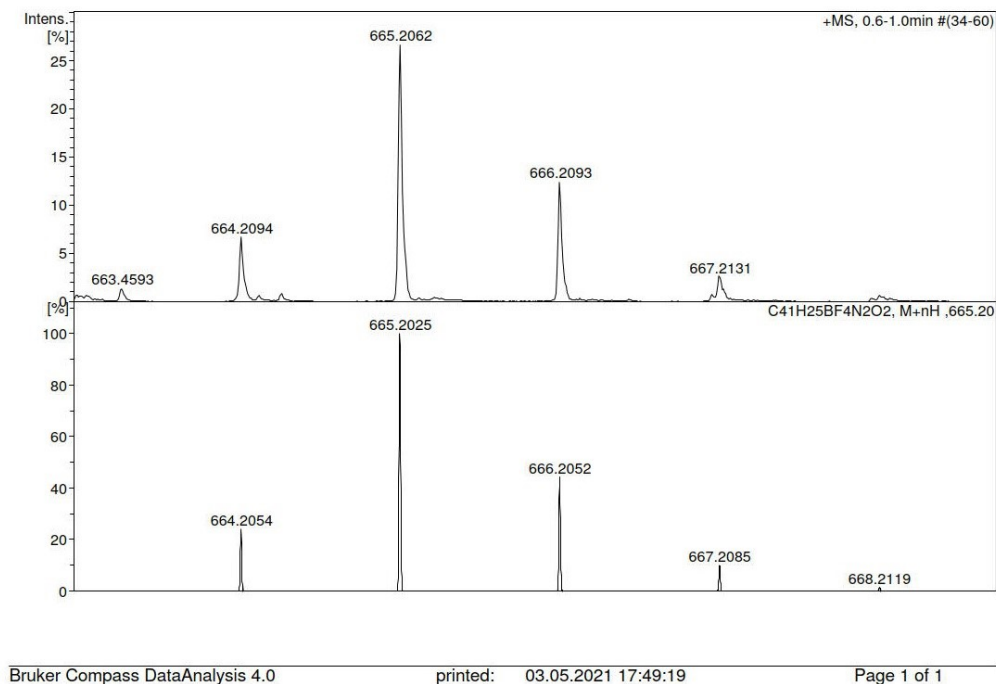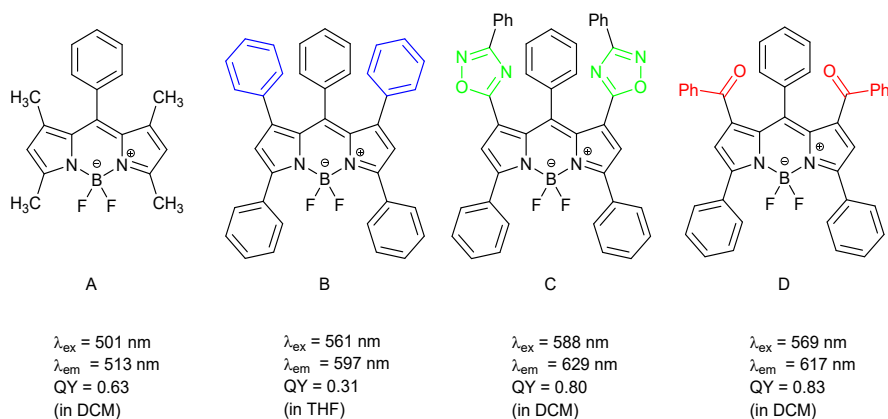

**Figure S1.** Experimental variation of the main peaks for excitation ( $\lambda_{\text{ex}}$ ) and emission ( $\lambda_{\text{em}}$ ) in nm and quantum yield depending on BODIPY ligand variation.

### 3. Quantum-chemical calculations

DFT and time-dependent density functional theory (TD-DFT) calculations to obtain minimum energy structures in both the ground and excited states for all structures reported in the text were performed by using Gaussian16 set of programs.<sup>1</sup> The ground state was optimized at B3LYP level<sup>2</sup> with 6-31G(d,p) basis set and stationary points were characterized using vibrational analysis. The absorption spectra for all structures were simulated by using TD-DFT calculations with a range-separated versions CAM-B3LYP<sup>3</sup> and 6-311+G(d,p) basis set. Solvent effects were treated by the conductor-like polarizable continuum model (CPCM) model<sup>4</sup> adopted in the linear response formalism when used with TD-DFT. According to a general trend of TD-DFT

methods<sup>5</sup> we found an overestimation of calculated absorption band peaks with respect to the experimental ones (reported in Figure 4 for **4a-4n** structures and Figure 5 of the main text) of about 0.3 eV; nevertheless, the shift for absorption and emission spectra going from structures **A-D** of Figure S1 is well reproduced (Figure S2-A and Figure S2-B). Finally, our TD-DFT analysis revealed that the maximum of absorption for the  $S_0 \leftarrow S_1$  transition corresponds to the HOMO and LUMO difference. The near-UV region with maximum at about 320-360 nm (see Figure S2-A) can be attributed to the  $S_0 \leftarrow S_2$  and  $S_0 \leftarrow S_3$  transitions and differences within the **4a-4n** structures may be found on the molecular contribution (compare Figure 6 and Figure S4). All details for the absorption and emission spectra for the new synthesized compounds are reported in Table S1 and Table S2. Finally, if we approximated the emission process by a vertical  $S_0 \leftarrow S_1$  transition, the emission decay rate  $k_r$  from the excited to the ground state can be calculated by using the equation (1):

$$kr = \frac{4}{3} \frac{\Delta E^3}{c^3} \mu_{10}^2 10 \quad (1)$$

where  $\Delta E$  corresponds to the  $S_0 \leftarrow S_1$  transition energy.  $c$  is the light speed and  $\mu_{10}^2$  is the transition dipole strength calculated in atomic unit. The values used for the plot of Figure 9 of the main text are reported in Table S1 and Table S3.

Once calculated the  $k_r$  of equation (1) by using the computational values reported in Table S1 and Table S3, we can estimate the  $k_{nr}$  of selected BODIPY compounds by using the experimental quantum yield in the equation (2).

$$\Phi = k_r / (k_r + k_{nr}) \quad (2)$$

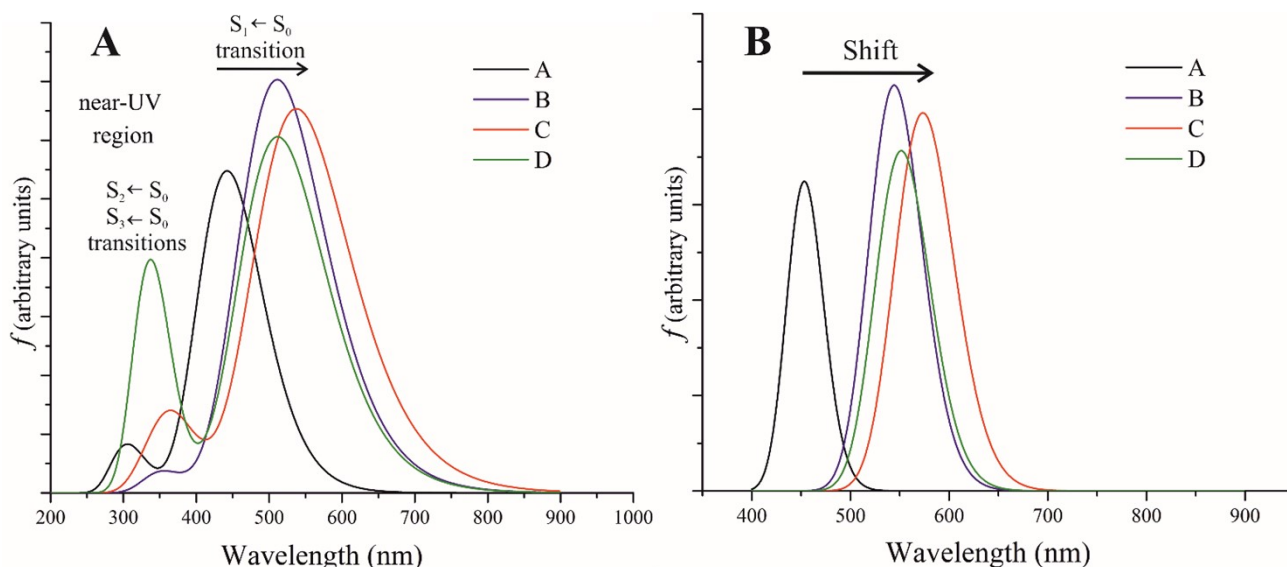

**Figure S2** TD-DFT (CAM-B3LYP/6311+G(d,p)) simulated spectra for excitation (**A**) and emission (**B**) of BODIPY compounds (**A**, **B**, **C**, **D**) reported in Figure S1 in  $\text{CH}_2\text{Cl}_2$  as solvent.

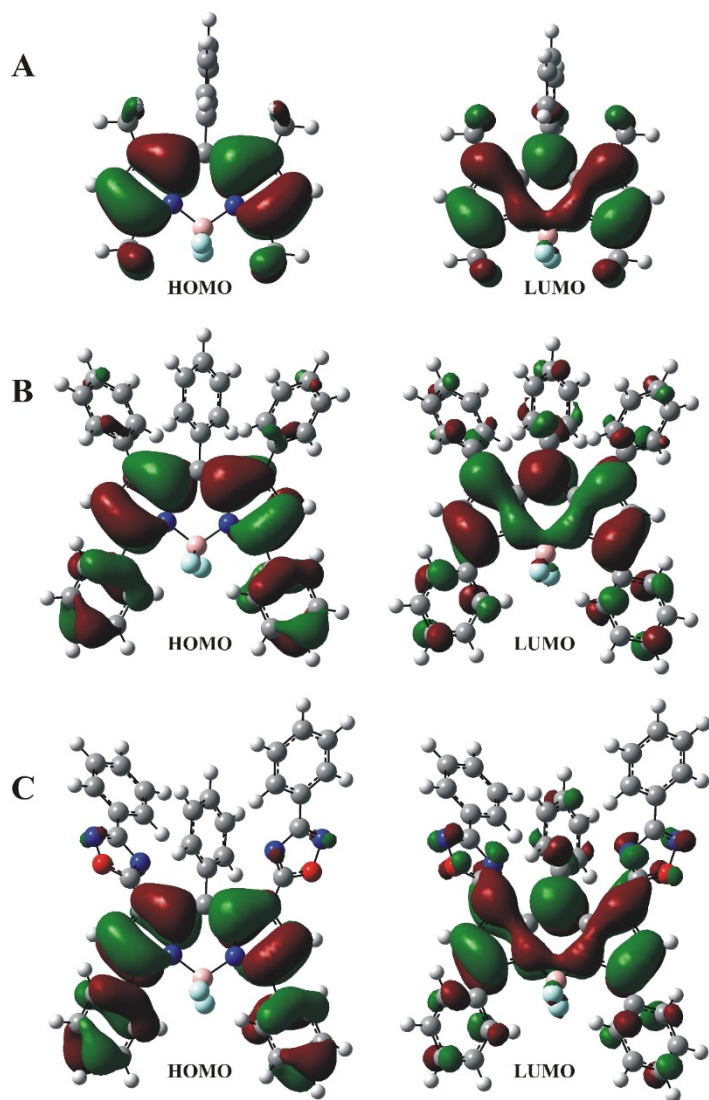

**Figure S3.** TD-DFT (CAM-B3LYP/6311+G(d,p)) molecular orbital for  $S_0 \leftarrow S_1$  transition corresponding to the HOMO (left) and LUMO (right) difference for BODIPY compounds **A**, **B**, **C** reported in Figure S1 in  $\text{CH}_2\text{Cl}_2$  as solvent.

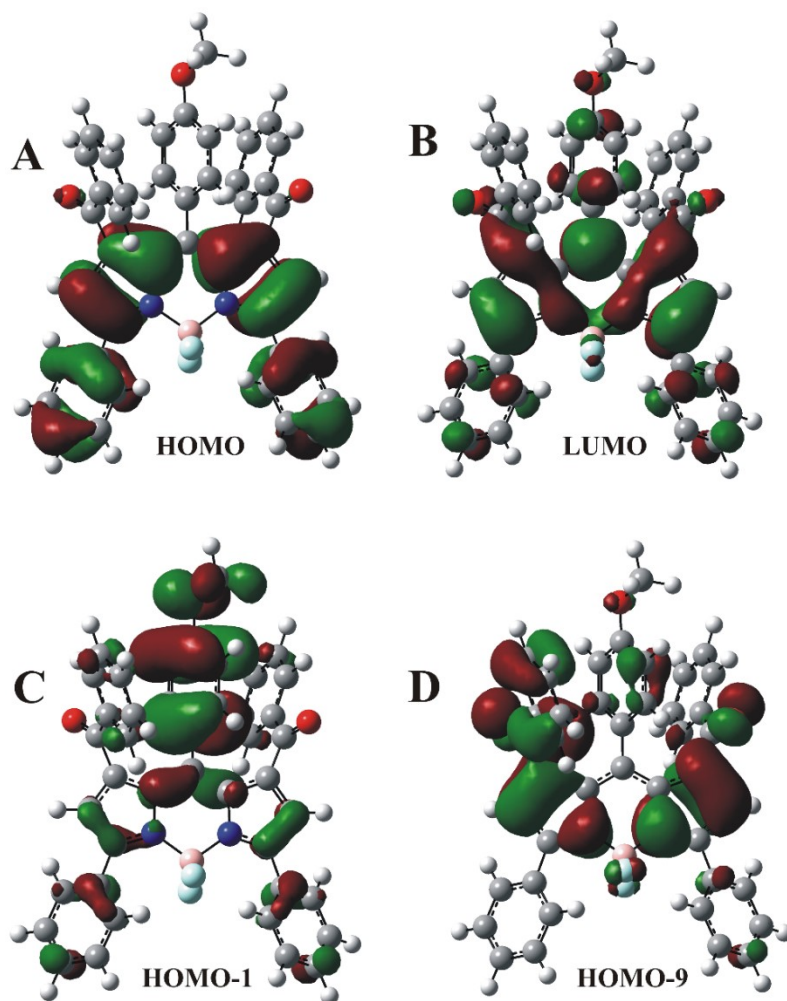

**Figure S4.** TD-DFT (CAM-B3LYP/6311+G(d,p)) molecular orbital of **4h** for the absorption peak at  $\lambda_{\text{ex}}$  565 nm ( $S_0 \leftarrow S_1$  transition) corresponding to the HOMO (**A**) and LUMO (**B**) difference whereas the maximum at about 325 nm can be attributed to the  $S_0 \leftarrow S_2$  and  $S_0 \leftarrow S_3$  transitions coming from the HOMO-1 (**C**) and HOMO-9 (**D**).

**Table S1.** Calculated main assignments (coefficient), excitation energies  $E$  (in eV), maximum absorption wavelengths  $\lambda_{\text{abs}}$  (in nm), the oscillator strength  $f$ , for selected compounds at the TD-CAM-B3LYP/6-311+G(d,p)//B3LYP/6-31G(d,p) level by using dichloromethane as solvent (CPCM).

| Compounds     | Main assignment               | $E$    | $\lambda_{\text{abs}}$ | $f$    |
|---------------|-------------------------------|--------|------------------------|--------|
| <b>A</b>      | H → L (0.70017)               | 2.8029 | 442.34                 | 0.6763 |
| <b>A</b>      | H <sub>1</sub> → L (0.6913)   | 3.8654 | 320.76                 | 0.0474 |
| <b>A</b>      | H <sub>2</sub> → L (0.7003)   | 4.1668 | 297.55                 | 0.0699 |
| <b>B</b>      | H → L (0.6965)                | 2.4287 | 510.49                 | 0.8634 |
| <b>B</b>      | H <sub>1</sub> → L (0.6886)   | 3.3556 | 369.49                 | 0.0039 |
| <b>B</b>      | H <sub>11</sub> → L (0.14859) | 3.5117 | 353.06                 | 0.0420 |
| <b>C</b>      | H → L (0.696)                 | 2.3104 | 536.62                 | 0.8027 |
| <b>C</b>      | H <sub>1</sub> → L (0.593)    | 3.3502 | 370.09                 | 0.1473 |
| <b>C</b>      | H <sub>10</sub> → L (0.586)   | 3.7130 | 333.92                 | 0.0476 |
| <b>D (4a)</b> | H → L (0.69527)               | 2.4225 | 511.79                 | 0.7480 |
| <b>D (4a)</b> | H <sub>1</sub> → L (0.64369)  | 3.6673 | 338.08                 | 0.4475 |
| <b>D (4a)</b> | H <sub>8</sub> → L (0.49436)  | 3.7628 | 329.50                 | 0.0450 |
| <b>4b</b>     | H → L (0.69534)               | 2.4161 | 513.16                 | 0.7493 |
| <b>4b</b>     | H <sub>1</sub> → L (0.65414)  | 3.6333 | 341.24                 | 0.4449 |
| <b>4b</b>     | H <sub>8</sub> → L (0.53123)  | 3.7625 | 329.52                 | 0.0404 |
| <b>4c</b>     | H → L (0.69530)               | 2.4095 | 514.55                 | 0.7504 |
| <b>4c</b>     | H <sub>1</sub> → L (0.66378)  | 3.6507 | 339.62                 | 0.5053 |
| <b>4c</b>     | H <sub>8</sub> → L (0.49913)  | 3.7575 | 329.97                 | 0.0450 |
| <b>4d</b>     | H → L (0.695)                 | 2.4053 | 515.47                 | 0.7516 |
| <b>4d</b>     | H <sub>1</sub> → L (0.6613)   | 3.6828 | 336.65                 | 0.5226 |
| <b>4d</b>     | H <sub>9</sub> → L (0.45180)  | 3.7580 | 329.92                 | 0.0577 |
| <b>4e</b>     | H → L (0.69617)               | 2.3130 | 536.02                 | 0.8180 |
| <b>4e</b>     | H <sub>1</sub> → L (0.56361)  | 3.5521 | 349.05                 | 0.0577 |
| <b>4e</b>     | H <sub>1</sub> → L (0.28836)  | 3.6880 | 336.19                 | 0.0085 |
| <b>4f</b>     | H → L (0.69514)               | 2.4304 | 510.13                 | 0.7411 |
| <b>4f</b>     | H <sub>1</sub> → L (0.67621)  | 3.4840 | 355.87                 | 0.4413 |
| <b>4f</b>     | H <sub>8</sub> → L (0.44567)  | 3.7655 | 329.27                 | 0.0287 |
| <b>4g</b>     | H → L (0.69571)               | 2.3806 | 520.81                 | 0.8182 |
| <b>4g</b>     | H <sub>1</sub> → L (0.56147)  | 3.4482 | 359.57                 | 0.0538 |
| <b>4g</b>     | H <sub>2</sub> → L (0.42078)  | 3.6972 | 335.35                 | 0.0244 |
| <b>4h</b>     | H → L (0.69503)               | 2.4370 | 508.76                 | 0.7319 |
| <b>4h</b>     | H <sub>1</sub> → L (0.68993)  | 3.2008 | 387.36                 | 0.4135 |
| <b>4h</b>     | H <sub>9</sub> → L (0.47307)  | 3.7716 | 328.73                 | 0.0289 |
| <b>4i</b>     | H → L (0.69503)               | 2.4115 | 514.13                 | 0.7453 |
| <b>4i</b>     | H <sub>1</sub> → L (0.64179)  | 3.6627 | 338.51                 | 0.4610 |
| <b>4i</b>     | H <sub>9</sub> → L (0.51749)  | 3.7637 | 329.42                 | 0.0458 |
| <b>4j</b>     | H → L (0.69506)               | 2.3999 | 516.63                 | 0.7486 |
| <b>4j</b>     | H <sub>1</sub> → L (0.66193)  | 3.6442 | 340.22                 | 0.5185 |
| <b>4j</b>     | H <sub>7</sub> → L (0.46753)  | 3.7598 | 329.77                 | 0.0452 |
| <b>4k</b>     | H → L (0.69505)               | 2.3936 | 517.99                 | 0.7461 |
| <b>4k</b>     | H <sub>1</sub> → L (0.66115)  | 3.6373 | 340.87                 | 0.5258 |
| <b>4k</b>     | H <sub>7</sub> → L (0.46402)  | 3.7576 | 329.96                 | 0.0441 |
| <b>4l</b>     | H → L (0.69512)               | 2.3926 | 518.19                 | 0.7480 |
| <b>4l</b>     | H <sub>1</sub> → L (0.66026)  | 3.6717 | 337.68                 | 0.5453 |
| <b>4l</b>     | H <sub>7</sub> → L (0.47451)  | 3.7587 | 329.86                 | 0.0554 |
| <b>4m</b>     | H → L (0.69540)               | 2.3652 | 524.19                 | 0.8370 |
| <b>4m</b>     | H <sub>1</sub> → L (0.54808)  | 3.4290 | 361.57                 | 0.0544 |
| <b>4m</b>     | H <sub>2</sub> → L (0.39946)  | 3.6823 | 336.71                 | 0.0281 |
| <b>4n</b>     | H → L (0.69522)               | 2.4189 | 512.56                 | 0.7485 |
| <b>4n</b>     | H <sub>1</sub> → L (0.64074)  | 3.6719 | 337.66                 | 0.4618 |
| <b>4n</b>     | H <sub>8</sub> → L (0.52516)  | 3.7733 | 328.58                 | 0.0444 |

**Table S2.** Calculated main assignments (coefficient), excitation energies  $E$  (in eV), maximum emission wavelengths  $\lambda_{em}$  (in nm), the oscillator strength  $f$ , for selected compounds at the TD-CAM-B3LYP/6-311+G(d,p)//TD-CAM-B3LYP/6-31G(d,p) level, by using dichloromethane as solvent (CPCM).

| Compounds     | Main assignment                         | $E$    | $\lambda_{em}$ | $f$    |
|---------------|-----------------------------------------|--------|----------------|--------|
| <b>A</b>      | H $\leftarrow$ L (0.7005)               | 2.7353 | 453.27         | 0.6400 |
| <b>B</b>      | H $\leftarrow$ L (0.6977)               | 2.2775 | 545.26         | 0.8429 |
| <b>C</b>      | H $\leftarrow$ L (0.6969)               | 2.1620 | 573.48         | 0.7815 |
| <b>D (4a)</b> | H $\leftarrow$ L (0.6964)               | 2.2477 | 551.61         | 0.7032 |
| <b>4b</b>     | H $\leftarrow$ L (0.6949)               | 2.2445 | 552.40         | 0.7074 |
| <b>4c</b>     | H $\leftarrow$ L (0.69646)              | 2.2337 | 555.07         | 0.7041 |
| <b>4d</b>     | H $\leftarrow$ L (0.6965)               | 2.2288 | 556.28         | 0.7037 |
| <b>4e</b>     | H $\leftarrow$ L (0.69740)              | 2.1230 | 584.01         | 0.7743 |
| <b>4f</b>     | H $\leftarrow$ L (0.69627)              | 2.2604 | 548.50         | 0.7010 |
| <b>4g</b>     | H $\leftarrow$ L (0.69687)              | 2.1662 | 572.37         | 0.7733 |
| <b>4g</b>     | H <sub>1</sub> $\leftarrow$ L (0.64922) | 3.1527 | 393.27         | 0.0851 |
| <b>4g</b>     | H <sub>2</sub> $\leftarrow$ L (0.50807) | 3.5145 | 352.78         | 0.0361 |
| <b>4h</b>     | H $\leftarrow$ L (0.69621)              | 2.2703 | 546.11         | 0.6981 |
| <b>4h</b>     | H <sub>1</sub> $\leftarrow$ L (0.69023) | 3.0996 | 400.00         | 0.4309 |
| <b>4h</b>     | H <sub>9</sub> $\leftarrow$ L (0.46426) | 3.7015 | 334.95         | 0.0195 |
| <b>4i</b>     | H $\leftarrow$ L (0.69621)              | 2.2371 | 554.23         | 0.6976 |
| <b>4j</b>     | H $\leftarrow$ L (0.69626)              | 2.2232 | 557.68         | 0.6980 |
| <b>4k</b>     | H $\leftarrow$ L (0.69626)              | 2.2179 | 559.02         | 0.6954 |
| <b>4l</b>     | H $\leftarrow$ L (0.69632)              | 2.2150 | 559.74         | 0.6955 |
| <b>4m</b>     | H $\leftarrow$ L (0.69622)              | 2.1533 | 575.78         | 0.7945 |
| <b>4n</b>     | H $\leftarrow$ L (0.69635)              | 2.2450 | 552.27         | 0.7037 |

**Table S3.** Experimental QY and calculated TD-CAM-B3LYP/6-311+G(d,p) (dichloromethane as solvent (CPCM))  $k_r$ , and  $k_{nr}$  values following the equations (2) and (3). The energies for the S<sub>0</sub>  $\leftarrow$  S<sub>1</sub> transition are reported in Table S1.

| Compounds | QY   | $k_{nr}$ (s <sup>-1</sup> ) | $k_r$ (s <sup>-1</sup> )   | $\mu^2_{10}$ |
|-----------|------|-----------------------------|----------------------------|--------------|
| <b>4a</b> | 0.83 | 9.44(10 <sup>-10</sup> )    | 4.60702(10 <sup>-9</sup> ) | 12.6022      |
| <b>4b</b> | 0.84 | 8.71(10 <sup>-10</sup> )    | 4.5706(10 <sup>-9</sup> )  | 12.6022      |
| <b>4c</b> | 0.96 | 1.91(10 <sup>-10</sup> )    | 4.57288(10 <sup>-9</sup> ) | 12.7124      |
| <b>4d</b> | 0.71 | 1.86(10 <sup>-9</sup> )     | 4.56422(10 <sup>-9</sup> ) | 12.7549      |
| <b>4f</b> | 0.67 | 2.32(10 <sup>-9</sup> )     | 4.7086(10 <sup>-9</sup> )  | 12.7549      |
| <b>4h</b> | 0.12 | 3.35(10 <sup>-8</sup> )     | 4.56228(10 <sup>-9</sup> ) | 12.2584      |

#### 4. Reference

- 1 M. J. T. Frisch, G.W.; Schlegel, H.B.; Scuseria, G.E.; Robb, M.A.; Cheeseman, J.R.; Montgomery, Jr., J.A.; Vreven, T.; Kudin, K.N.; Burant, J.C.; Millam, J.M.; Iyengar, S.S.; Tomasi, J.; Barone, V.; Mennucci, B.; Cossi, M.; Scalmani, G.; Rega, N.; Petersson, G.A.; Nakatsuji, H.; Hada, M.; Ehara, M.; Toyota, K.; Fukuda, R.; Hasegawa, J.; Ishida, M.; Nakajima, T.; Honda, Y.; Kitao, O.; Nakai, H.; Klene, M.; Li, X.; Knox, J.E.; Hratchian, H.P.; Cross, J. B.; Bakken, V.; Adamo, C.; Jaramillo, J.; Gomperts, R.; Stratmann, R.E.; Yazyev, O.; Austin, A.J.; Cammi, R.; Pomelli, C.; Ochterski, J.W.; Ayala, P.Y.; Morokuma, K.; Voth, G.A.; Salvador, P.; Dannenberg, J.J.; Zakrzewski, V.G.; Dapprich, S.; Daniels, A.D.; Strain, M.C.; Farkas, O.; Malick, D.K.; Rabuck, A.D.; Raghavachari, K.; Foresman, J.B.; Ortiz, J.V.; Cui, Q.; Baboul, A.G.; Clifford, S.; Cioslowski, J.; Stefanov, B.B.; Liu, G.; Liashenko, A.; Piskorz, P.; Komaromi, I.; Martin, R.L.; Fox, D.J.; Keith, T.; Al-Laham, M.A.; Peng, C.Y.; Nanayakkara, A.; Challacombe, M.; Gill, P.M.W.; Johnson, B.; Chen, W.; Wong, M.W.; Gonzalez, C.; and Pople, J.A.; Gaussian, Inc., Wallingford CT, 2004, 2004.
- 2 a) A. D. Becke, *J. Chem. Phys.*, 1993, **98**, 1372-1377; b) A. D. Becke, *J. Chem. Phys.*, 1993, **98**, 5648; c) C. Lee, W. Yang and R. G. Parr, *Phys. Rev. B*, 1988, **37**, 785.
- 3 T. Yanai, D. P. Tew and N. C. Handy, *Chem. Phys. Lett.*, 2004, **393**, 51.
- 4 M. Cossi, N. Rega, G. Scalmani and V. Barone, *J. Comput. Chem.*, 2003, **24**, 669.
- 5 D. Jacquemin, E. A. Perpète, G. E. Scuseria, I. Ciofini and C. Adamo, *J. Chem. Theory Comput.*, 2008, **4**, 123.
